# Supplementary figures and images for: Crossing Point Estimation in Human/Robot Navigation - Statistical Linearization versus Sigma-Point-Transformation
Source: Preprints.org preprint supplement (doi:10.20944/preprints202403.1747.v1), 2024-03-28

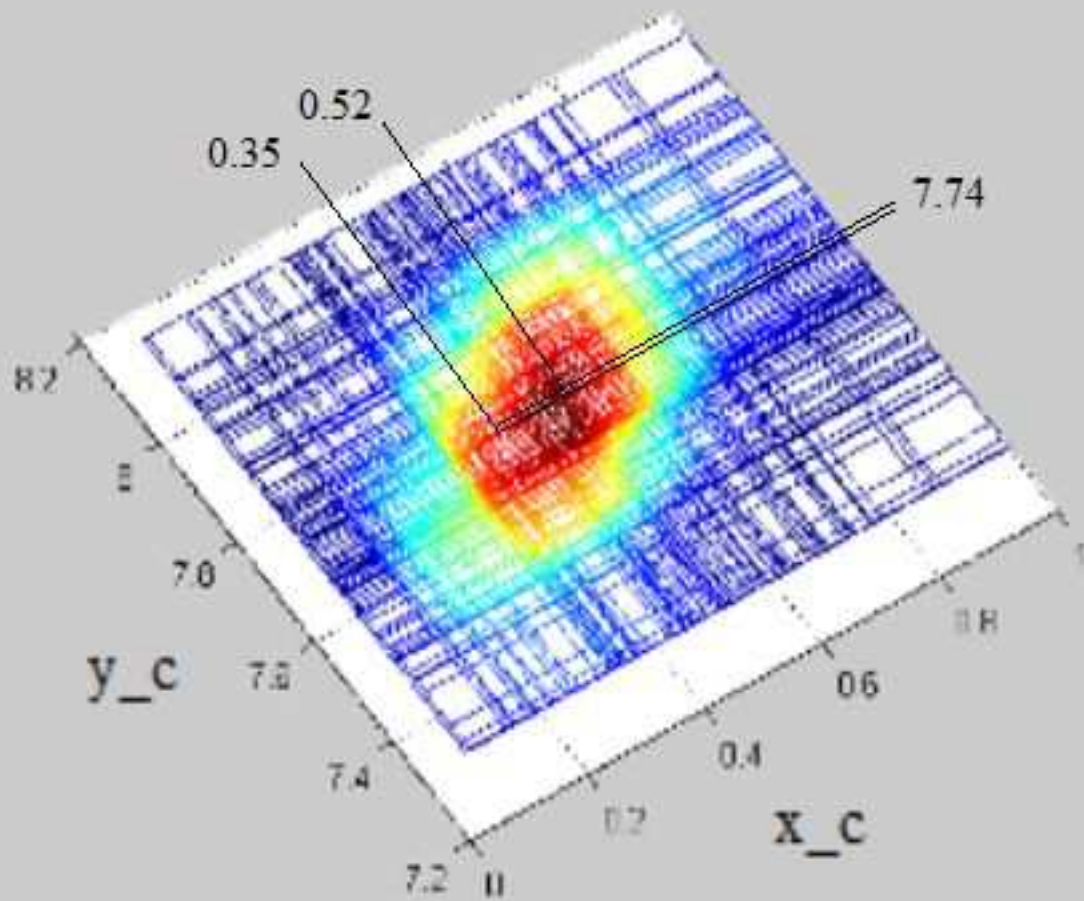

Supplement: Supplementary file 1 [file supplementary]

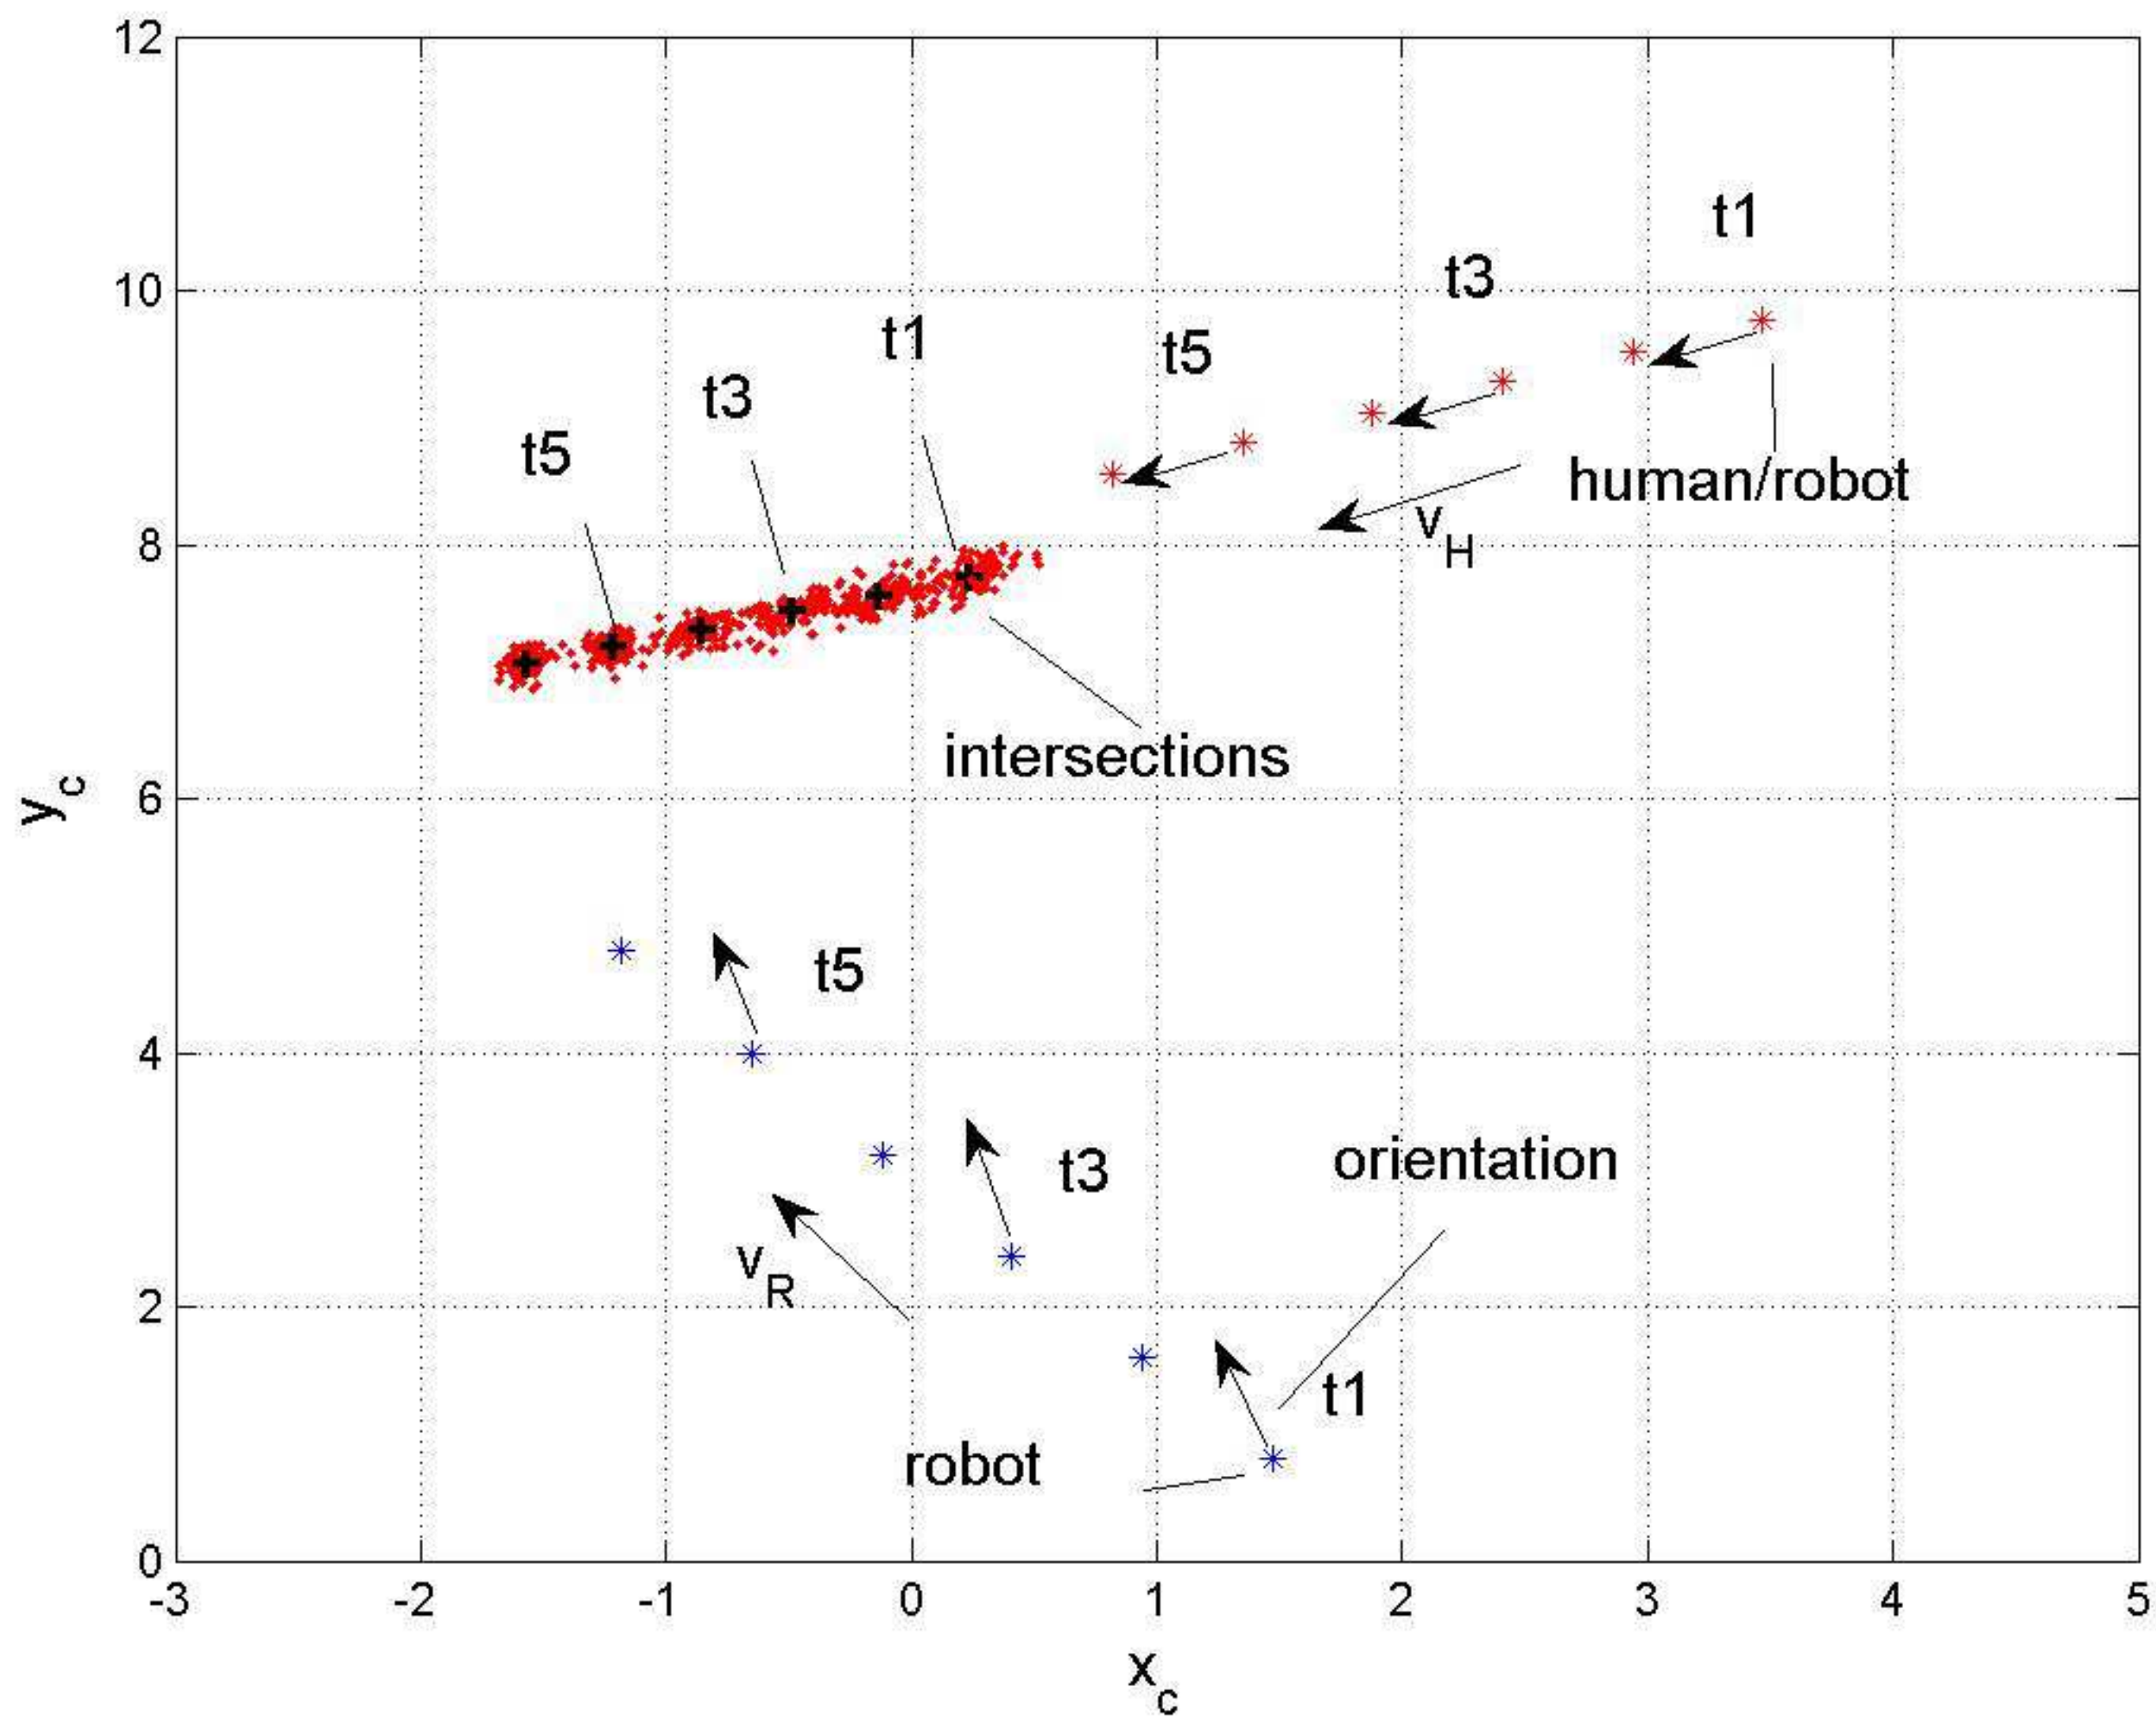

Supplement: Supplementary file 2 [file supplementary]

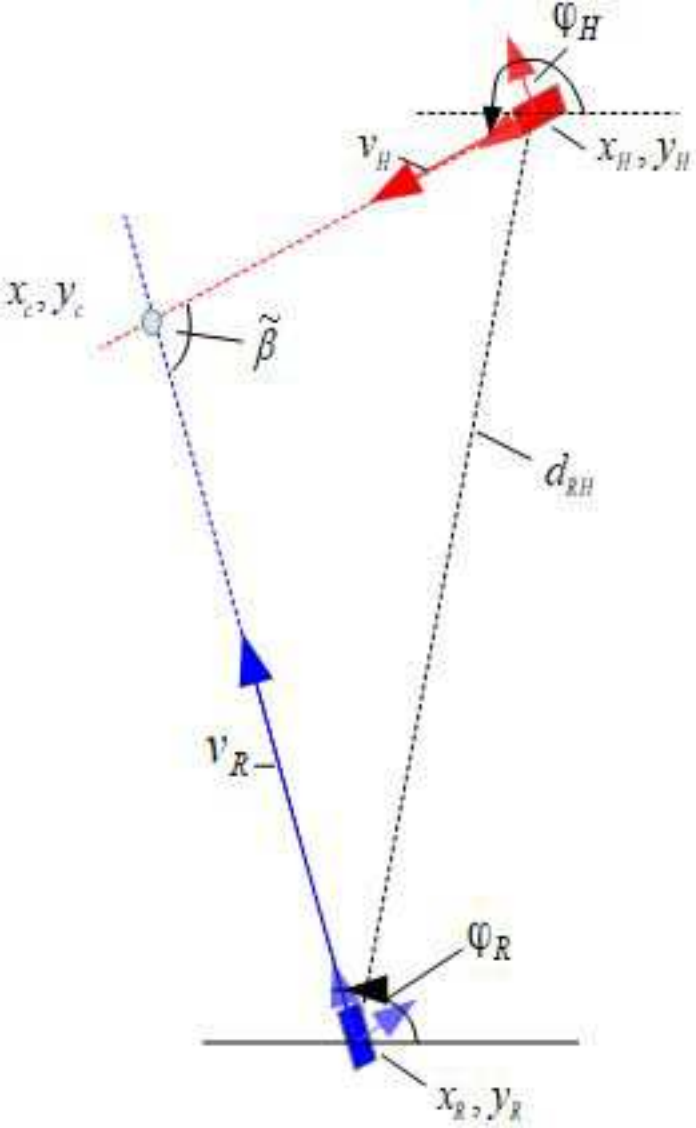

Supplement: Supplementary file 3 [file supplementary]

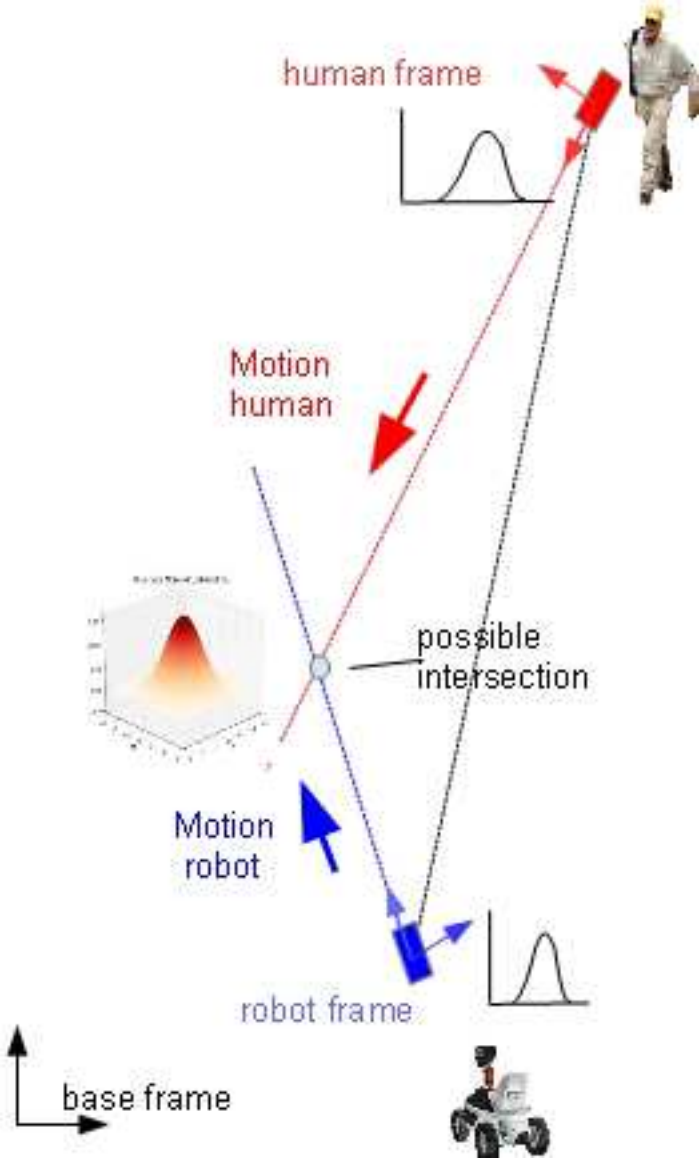

Supplement: Supplementary file 5 [file supplementary]

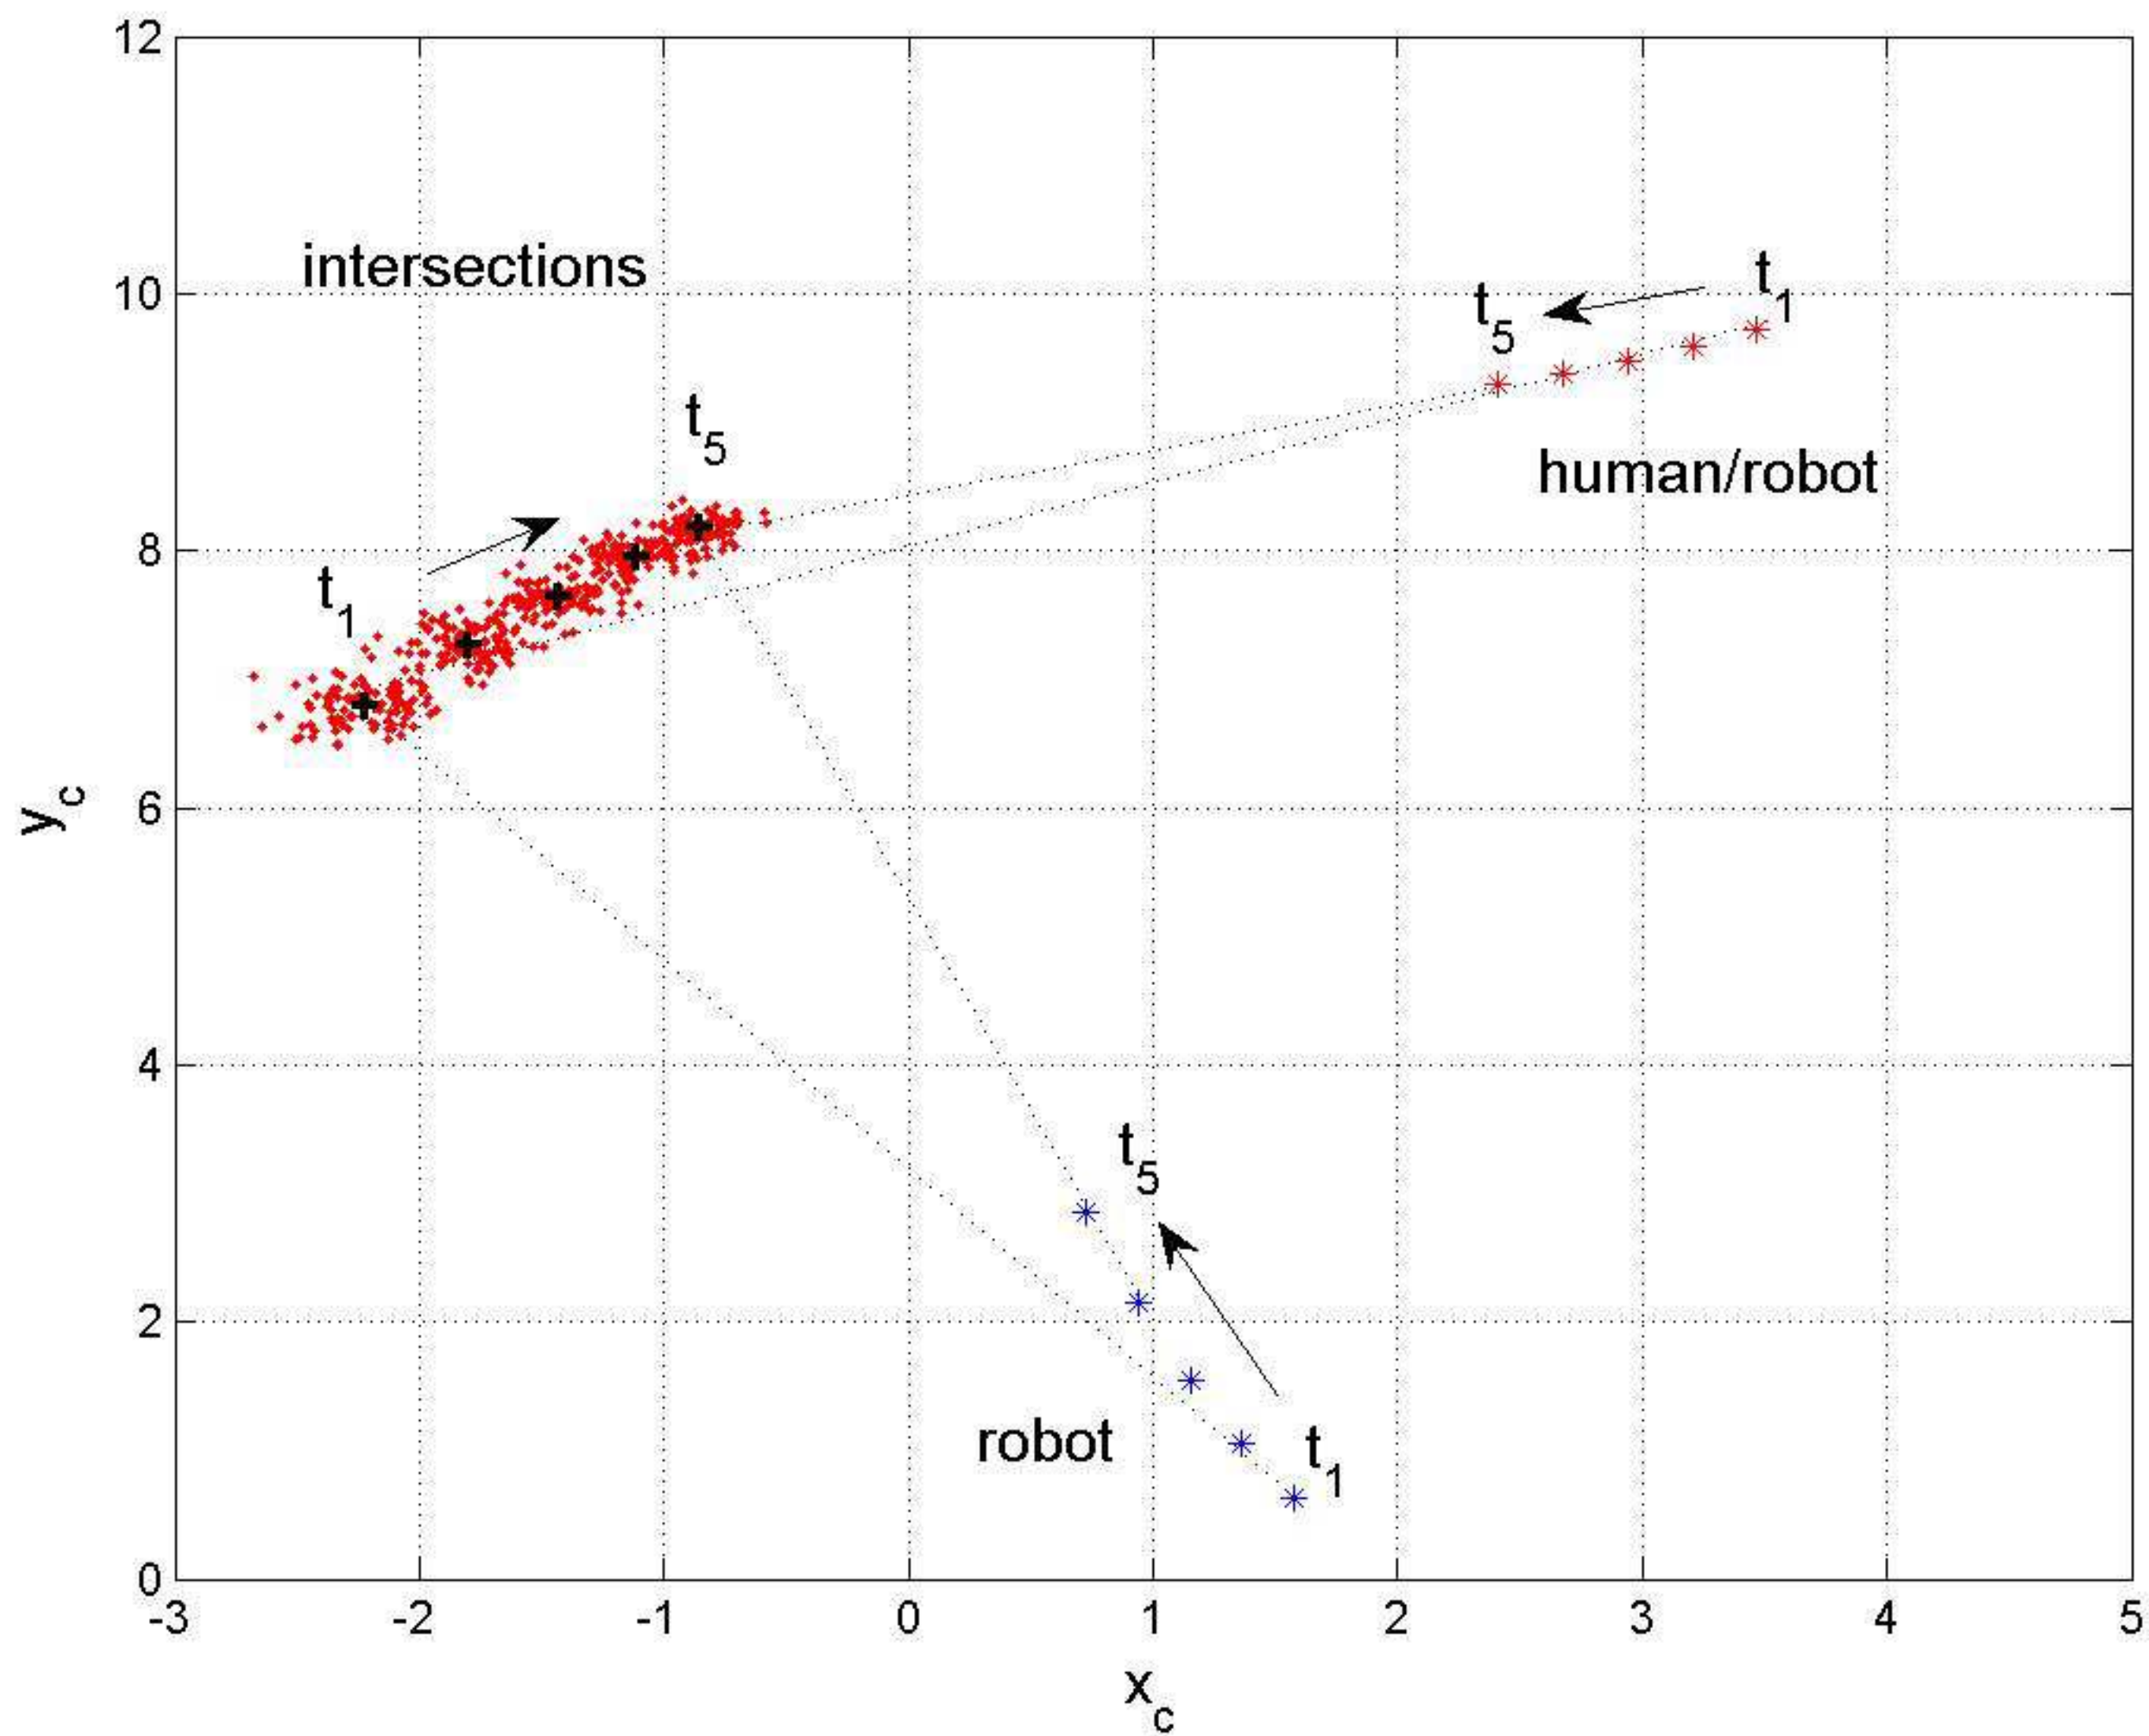

Supplement: Supplementary file 6 [file supplementary]

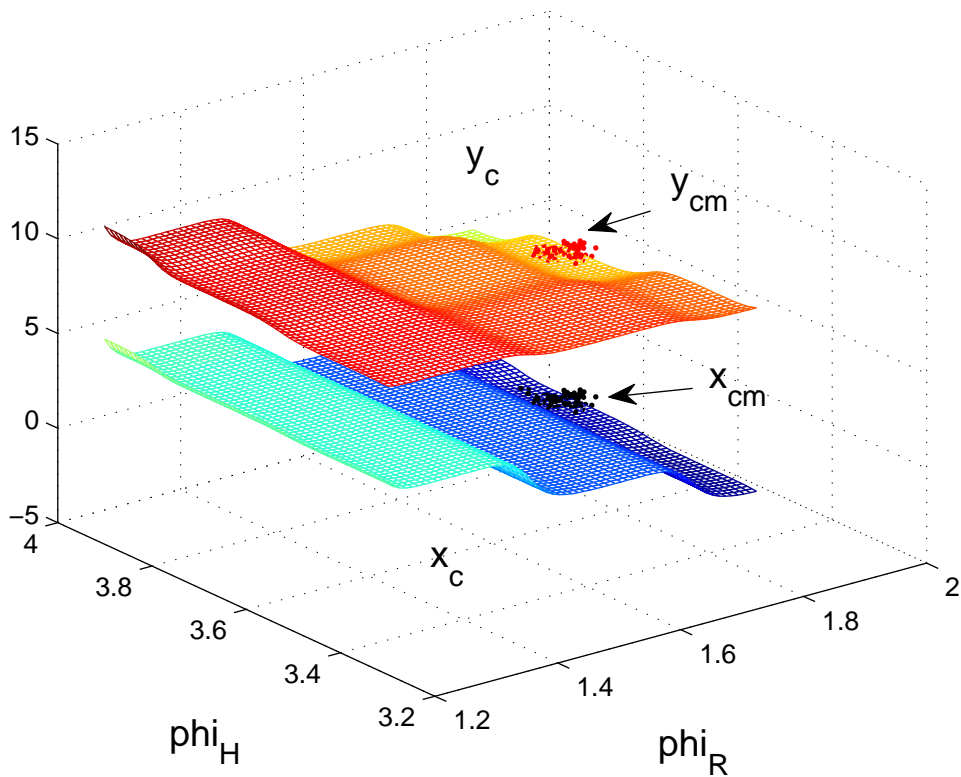

Supplement: Supplementary file 7 [file supplementary]

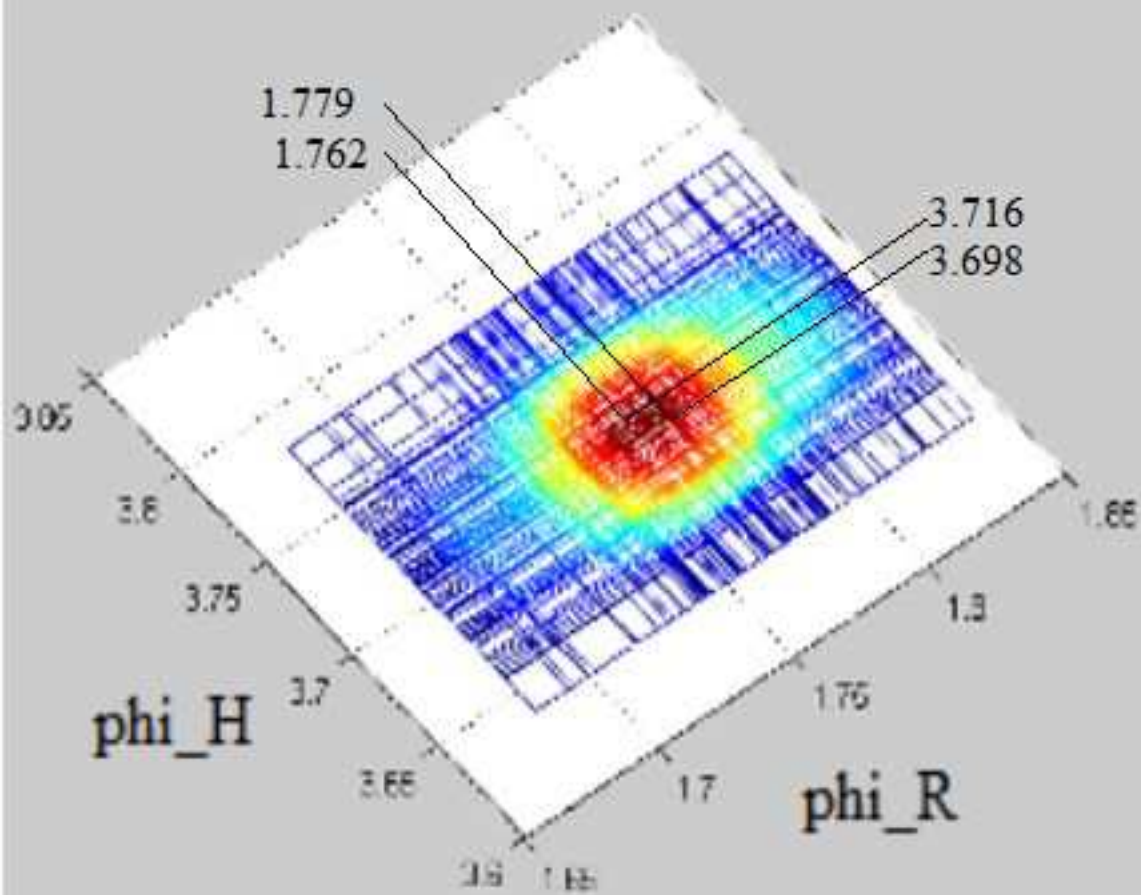

Supplement: Supplementary file 8 [file supplementary]

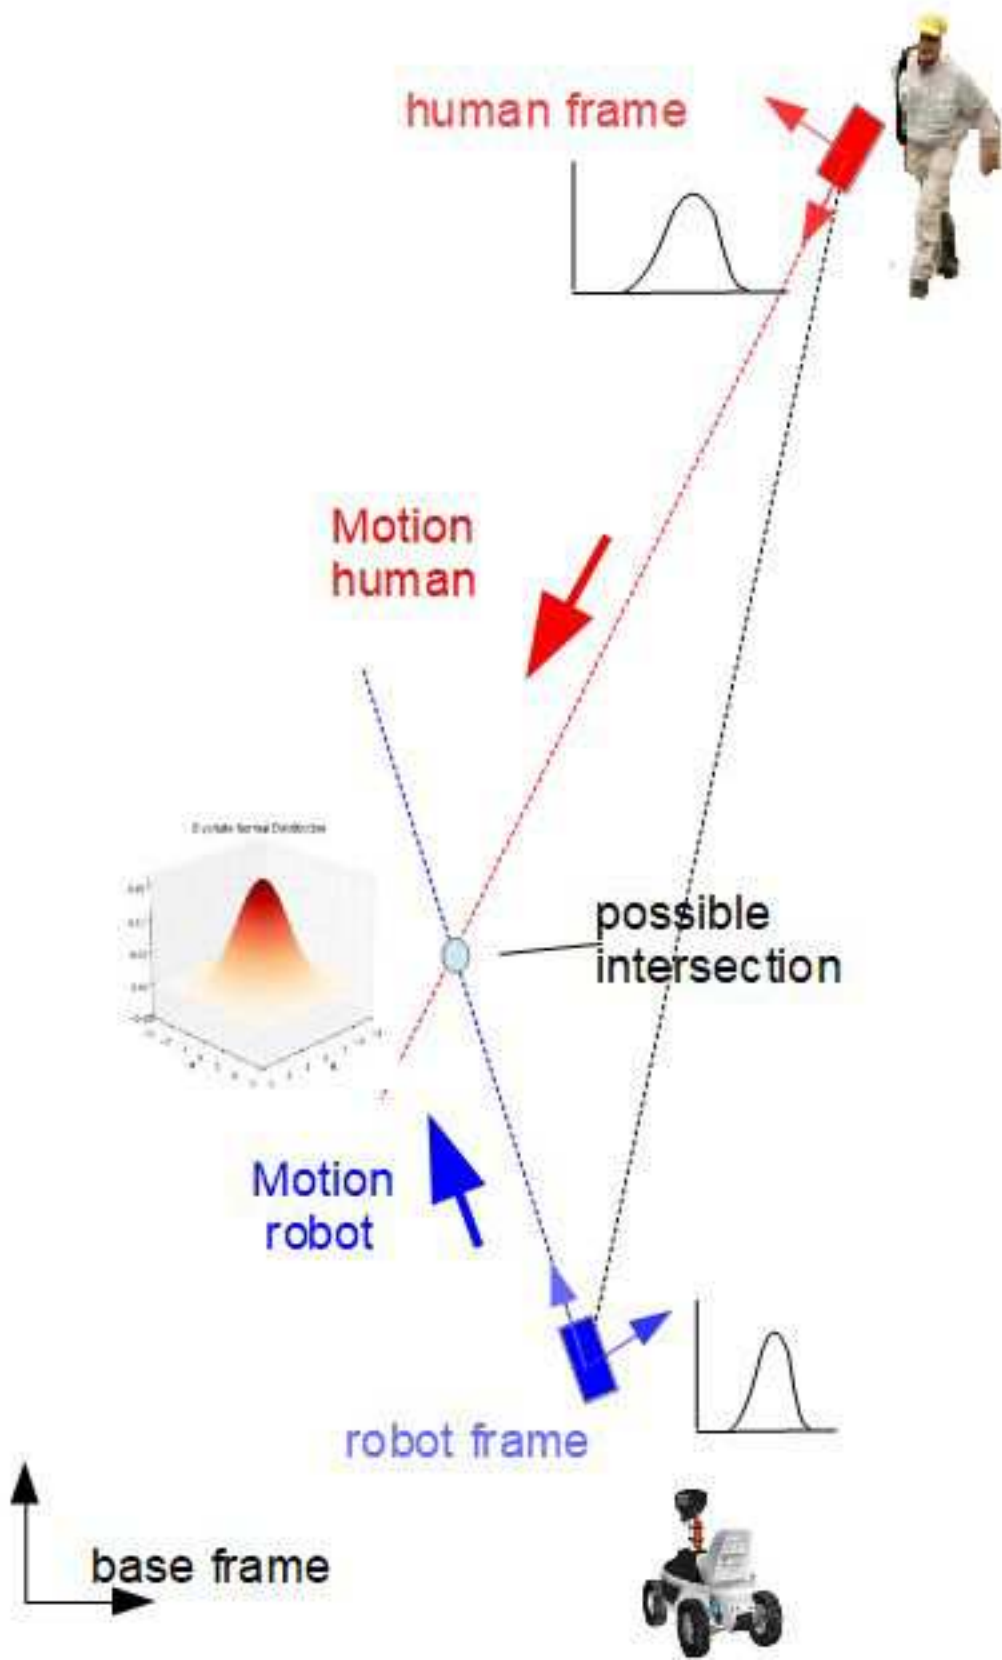

Supplement: Supplementary file 9 [file supplementary]

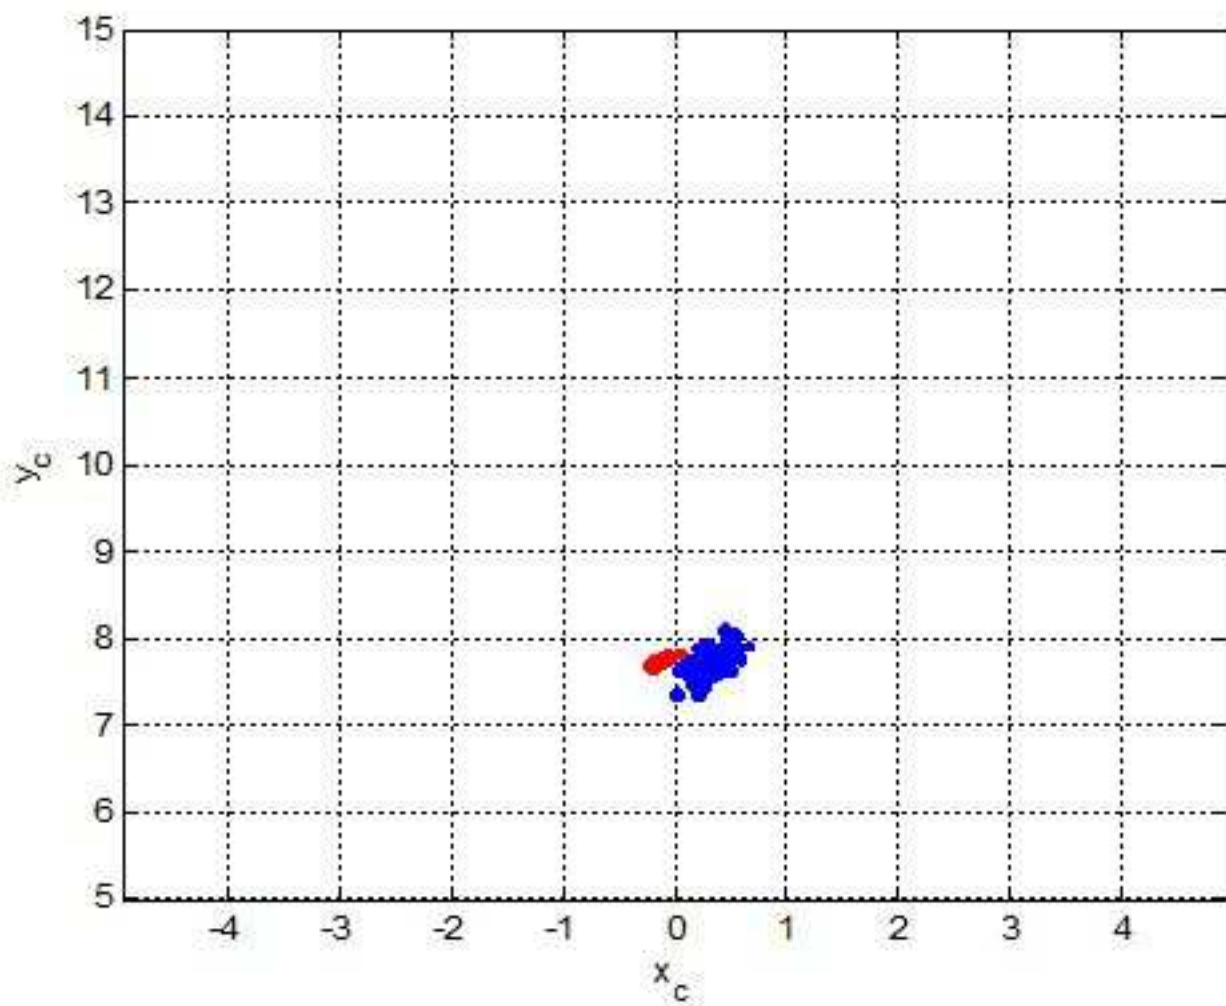

Supplement: Supplementary file 10 [file supplementary]

resolution  $\rightarrow 7.5^\circ$

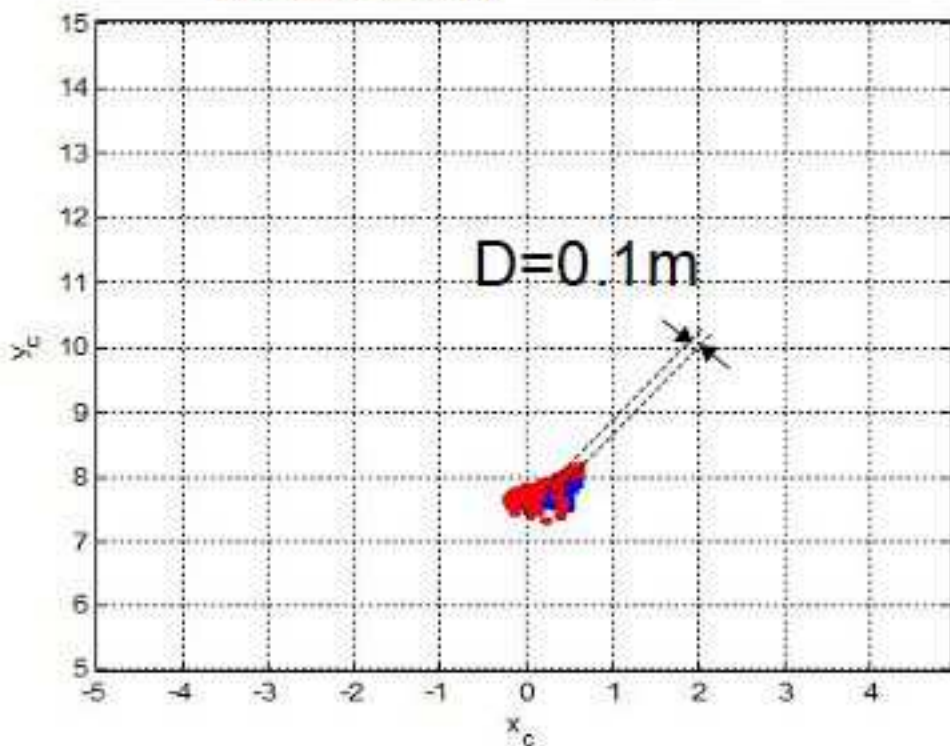

Supplement: Supplementary file 11 [file supplementary]

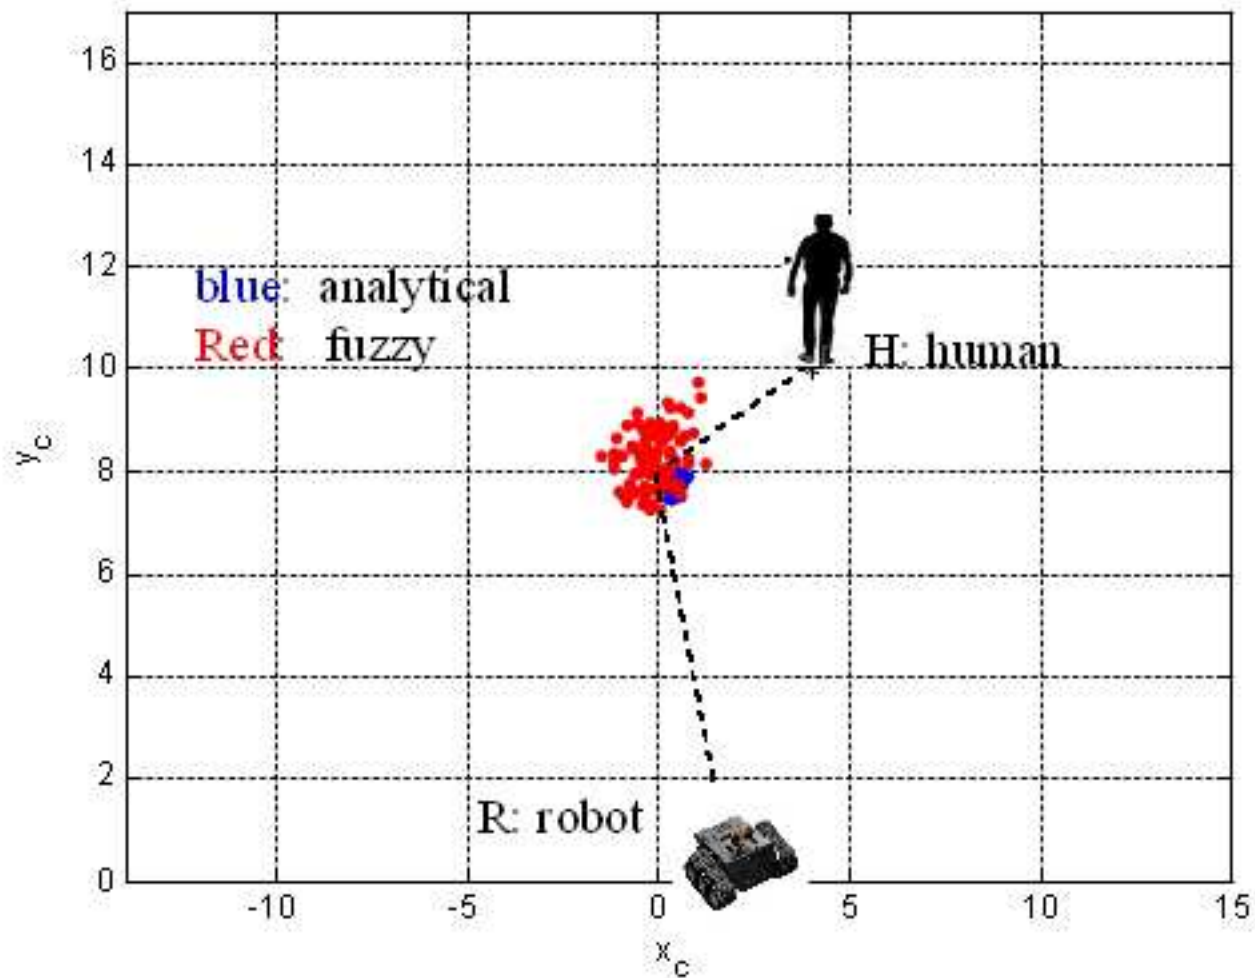

Supplement: Supplementary file 12 [file supplementary]

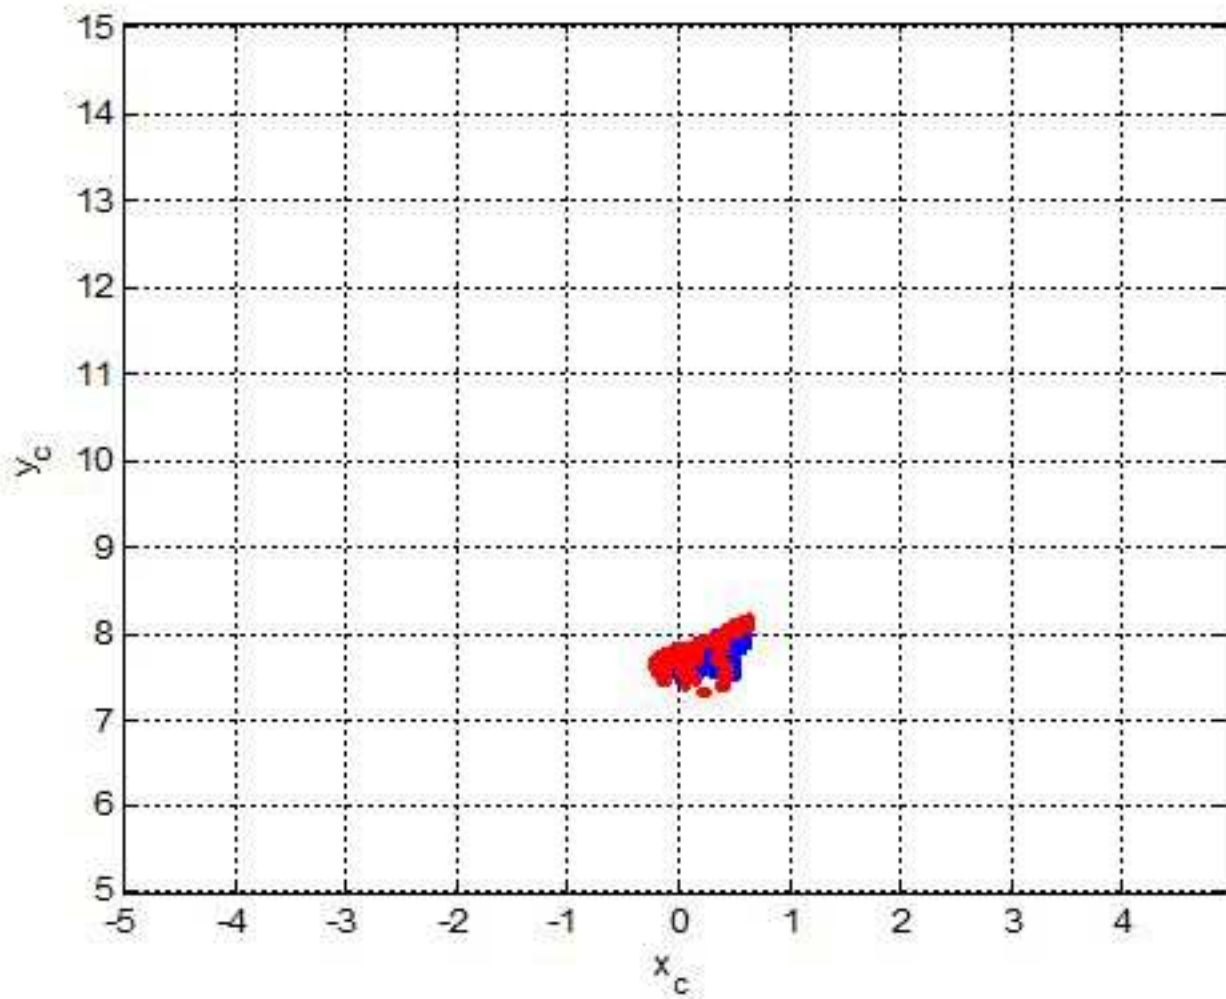

Supplement: Supplementary file 13 [file supplementary]

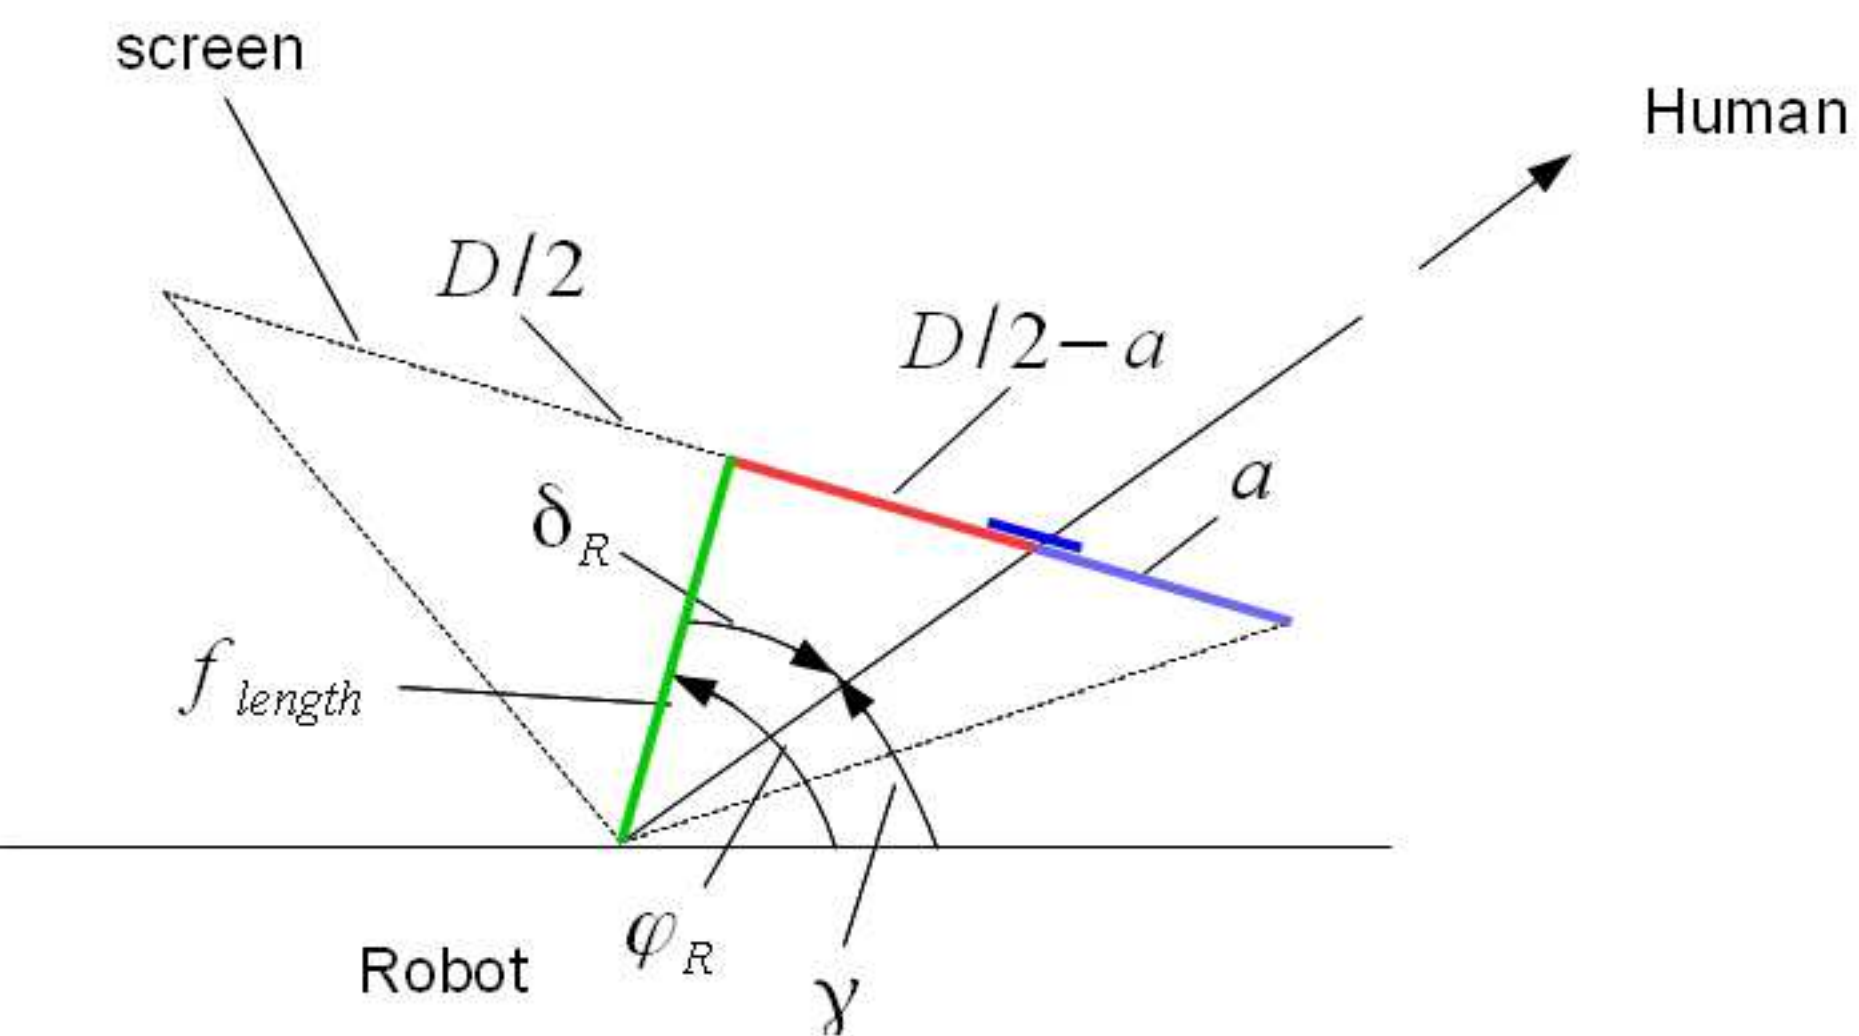

$$\delta_R = \arctan \left( (D/2 - a) / f_{length} \right)$$

Supplement: Supplementary file 14 [file supplementary]

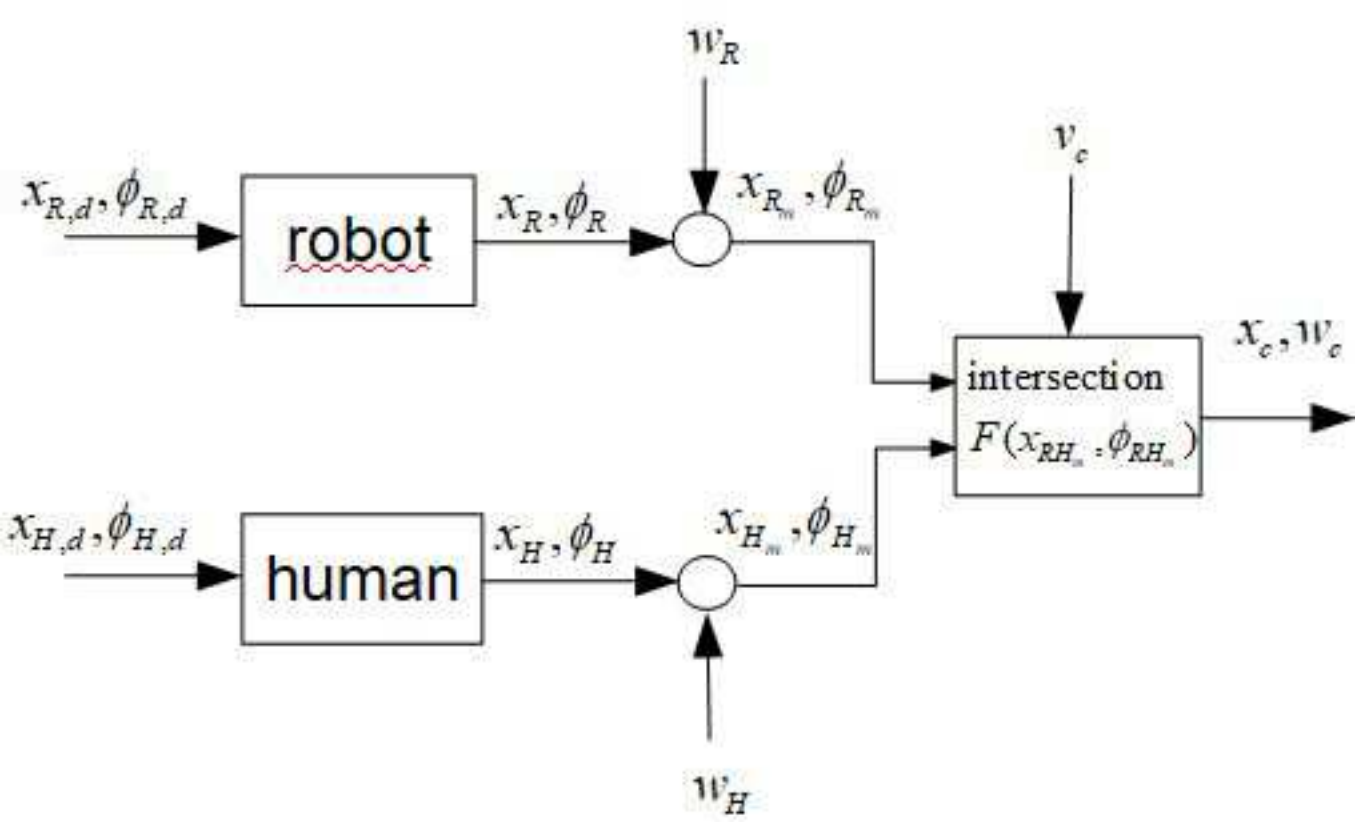

Supplement: Supplementary file 15 [file supplementary]

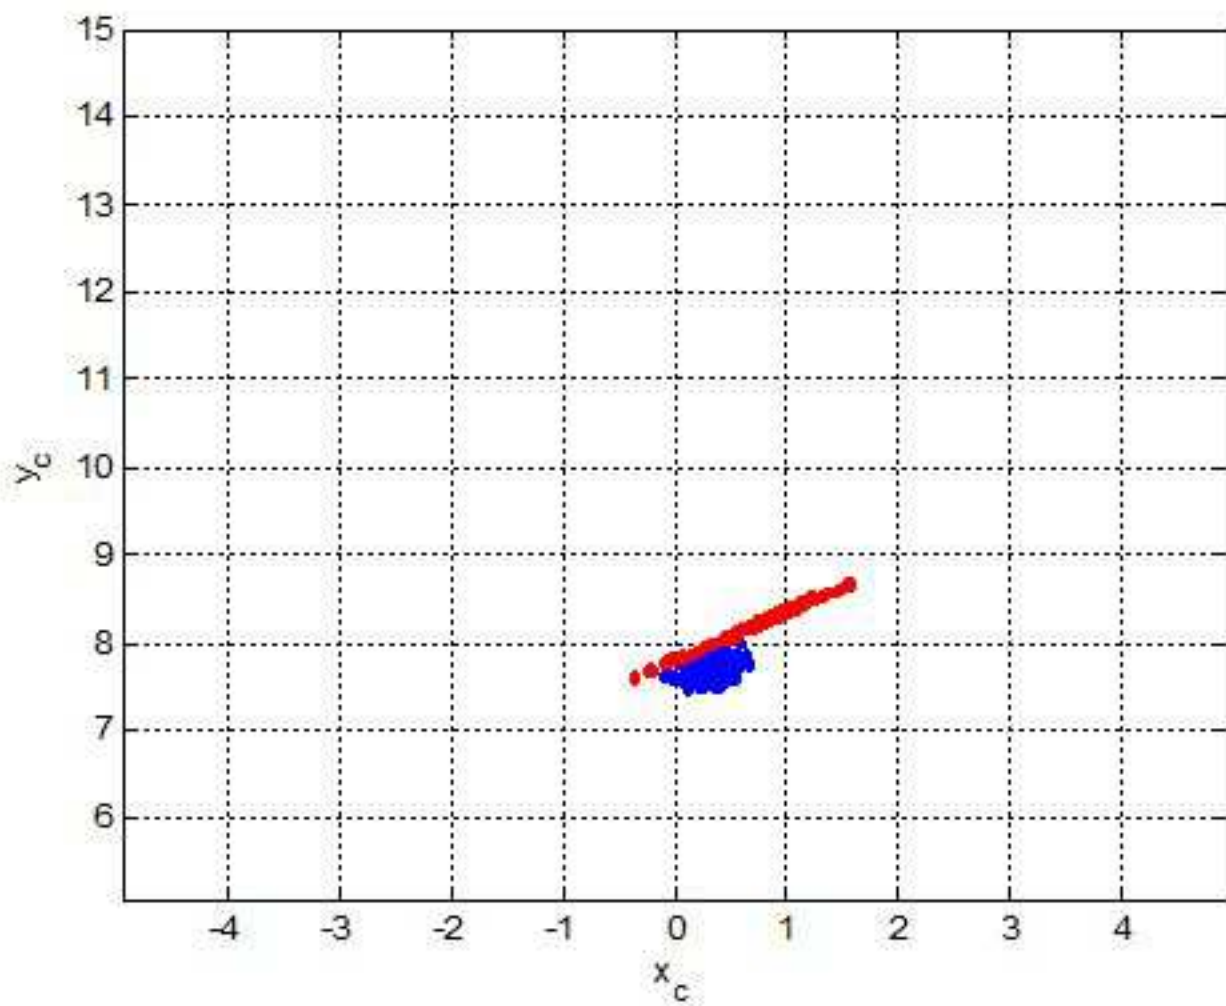

Supplement: Supplementary file 16 [file supplementary]

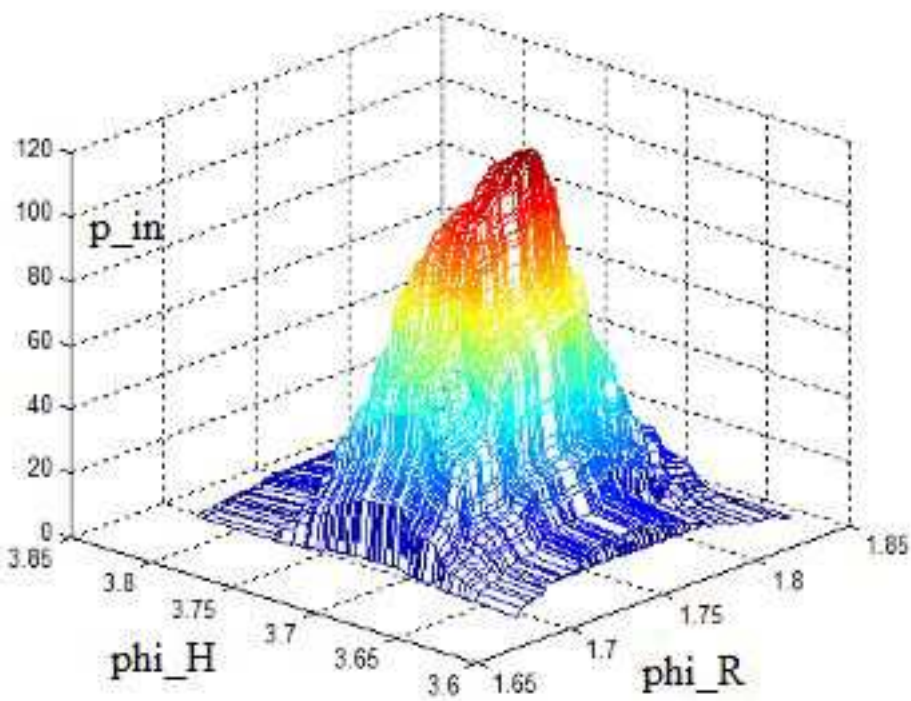

Supplement: Supplementary file 17 [file supplementary]

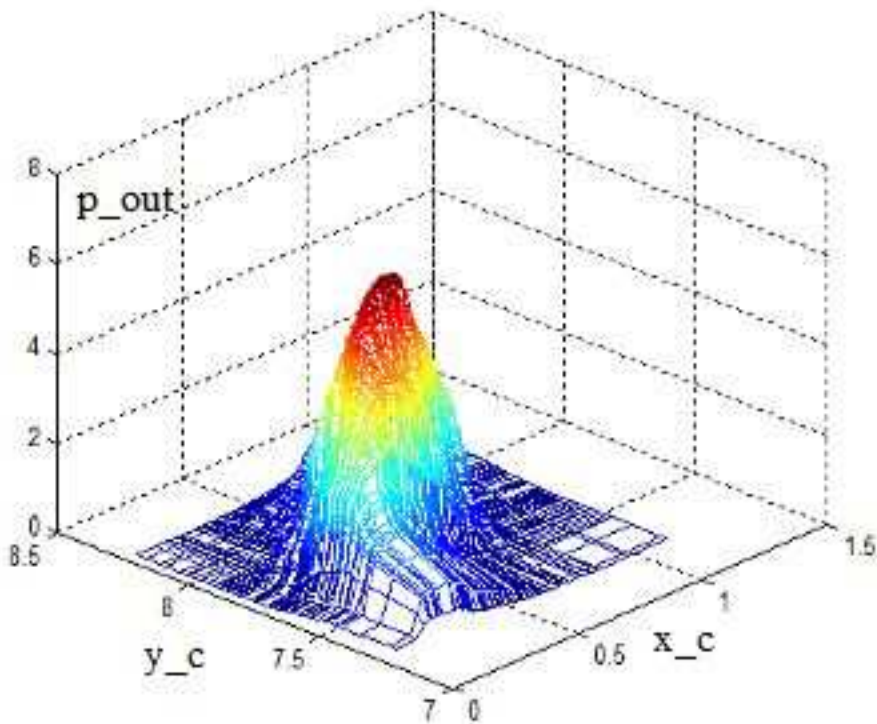

Supplement: Supplementary file 18 [file supplementary]

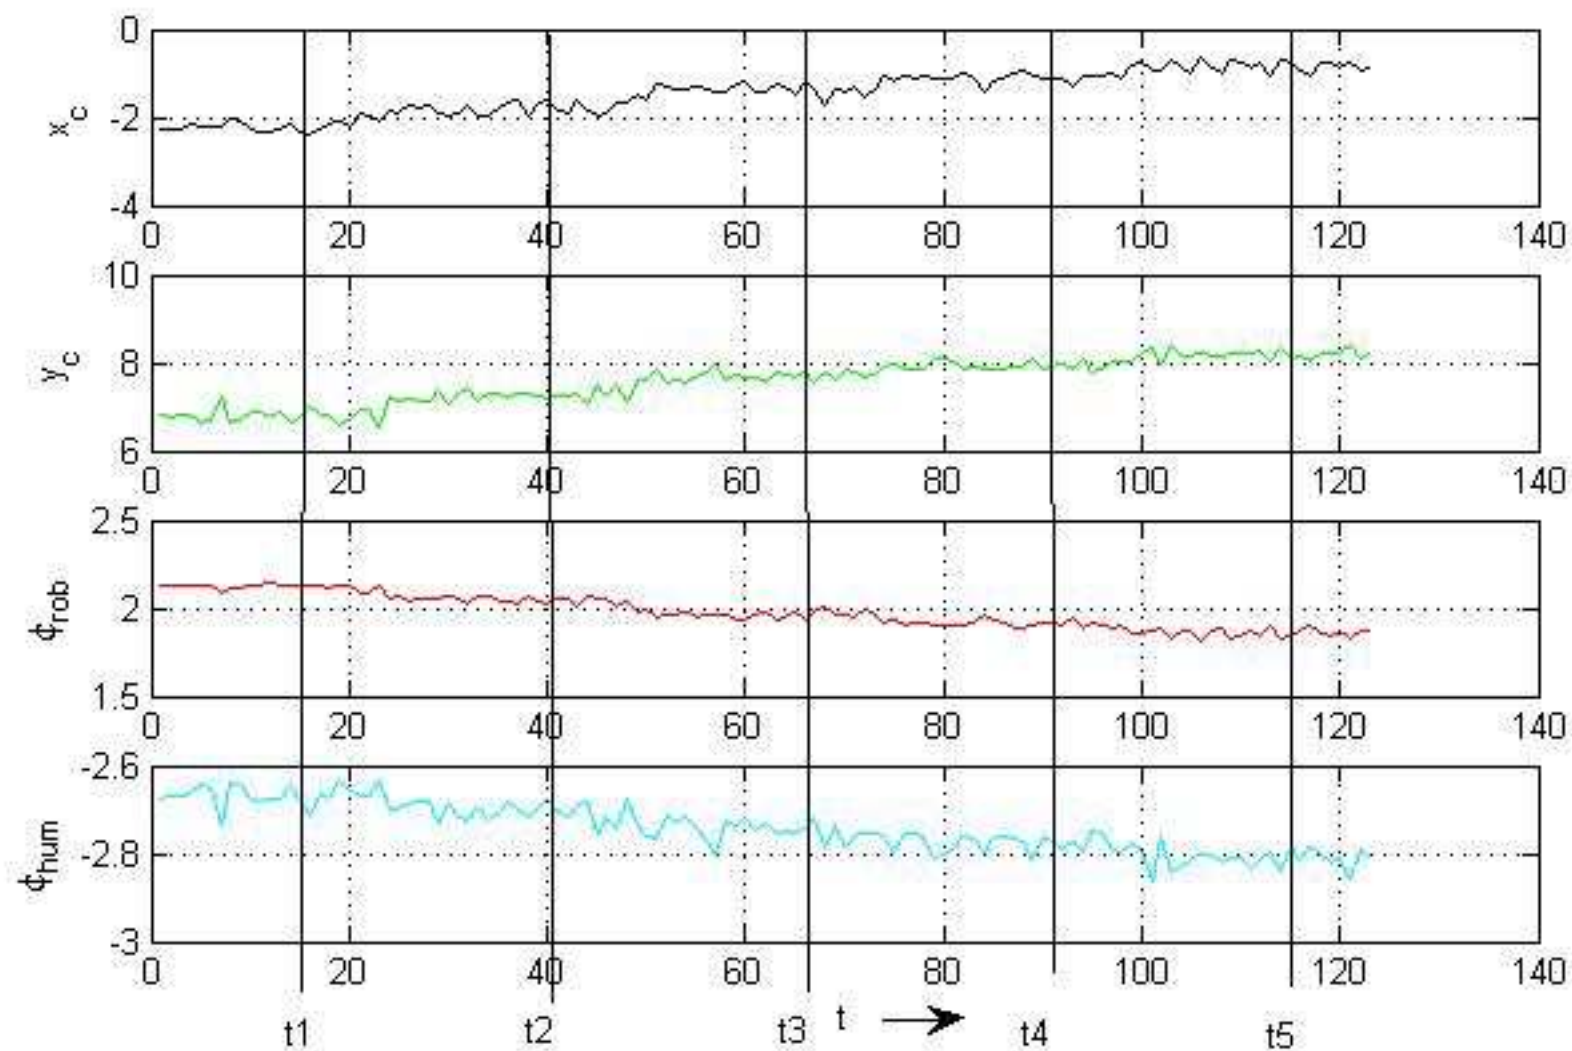

Supplement: Supplementary file 19 [file supplementary]

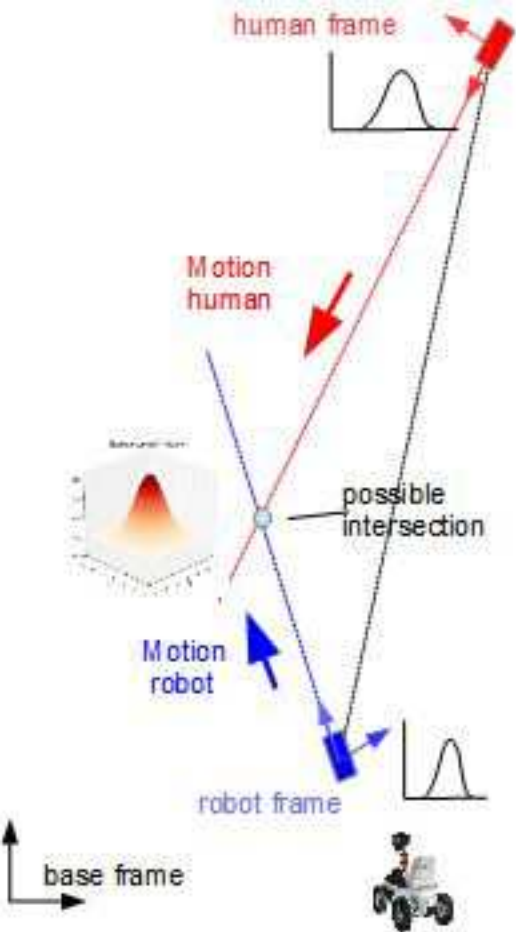

Supplement: Supplementary file 20 [file supplementary]

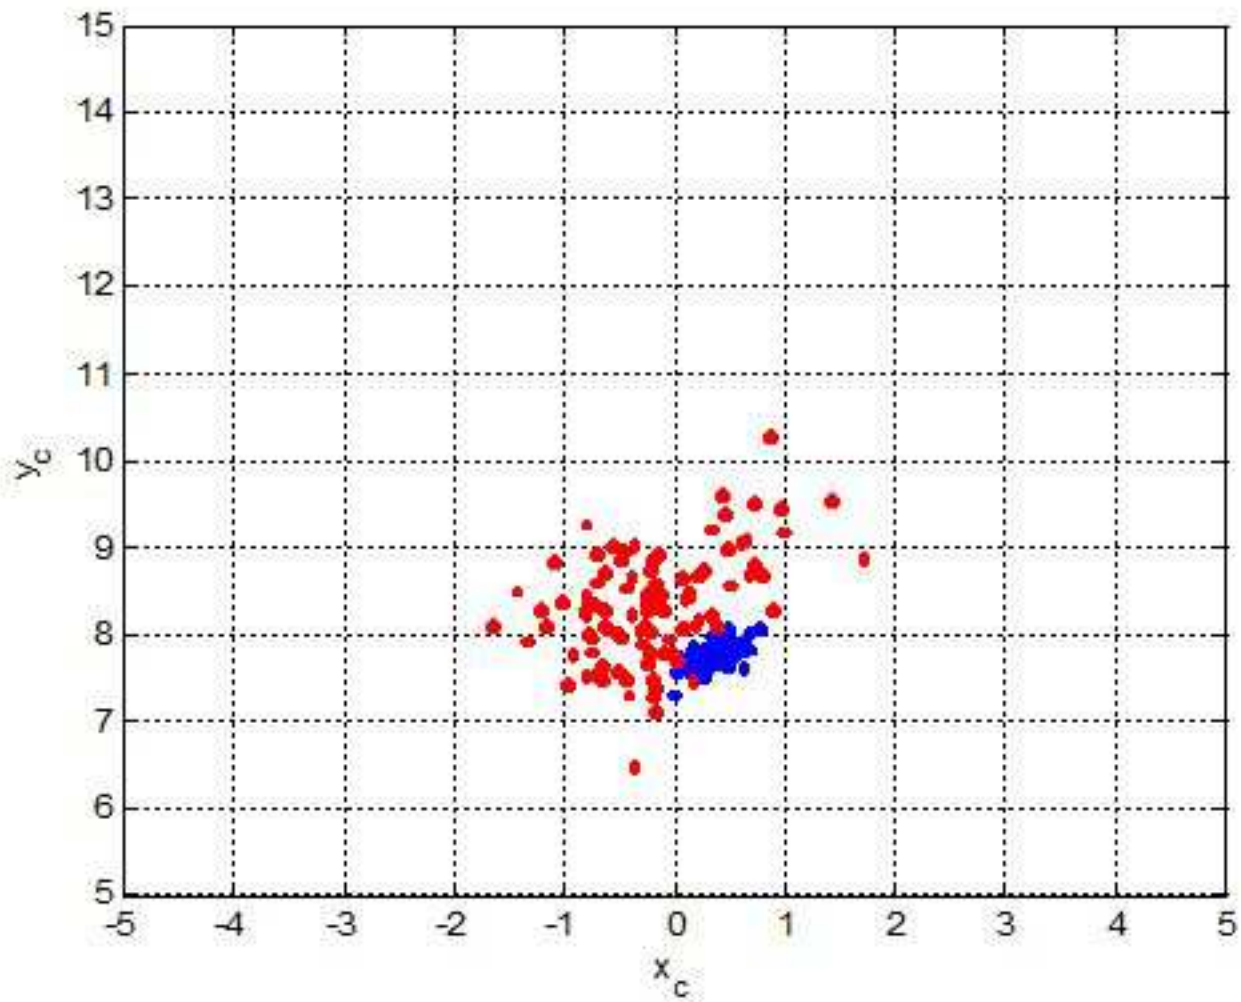

Supplement: Supplementary file 21 [file supplementary]

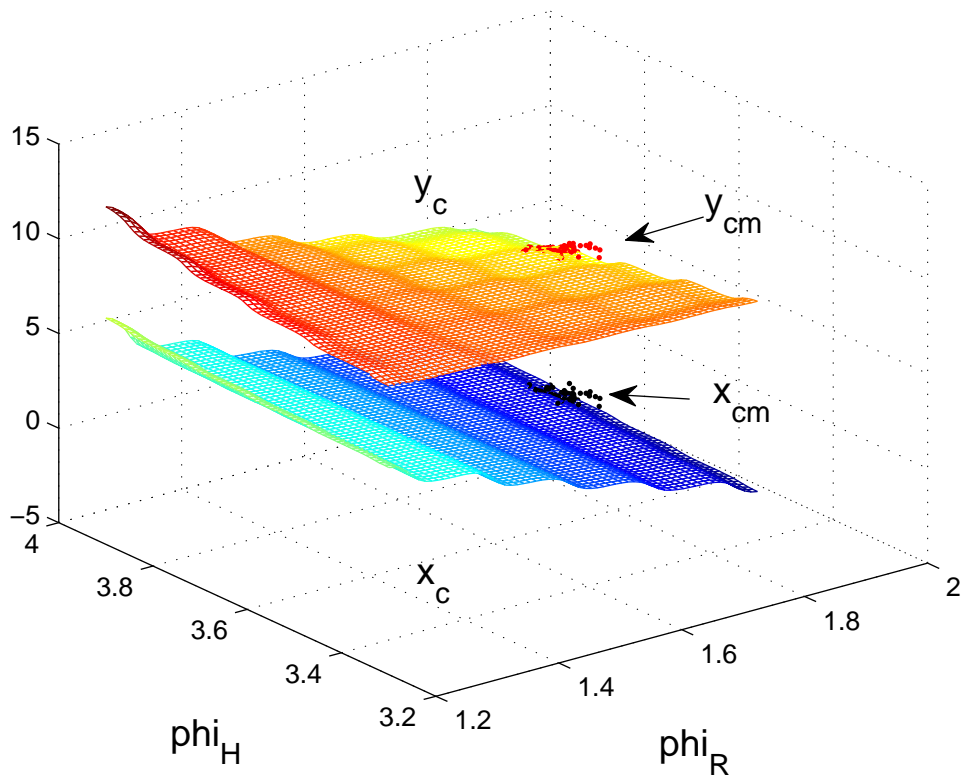

Supplement: Supplementary file 22 [file supplementary]

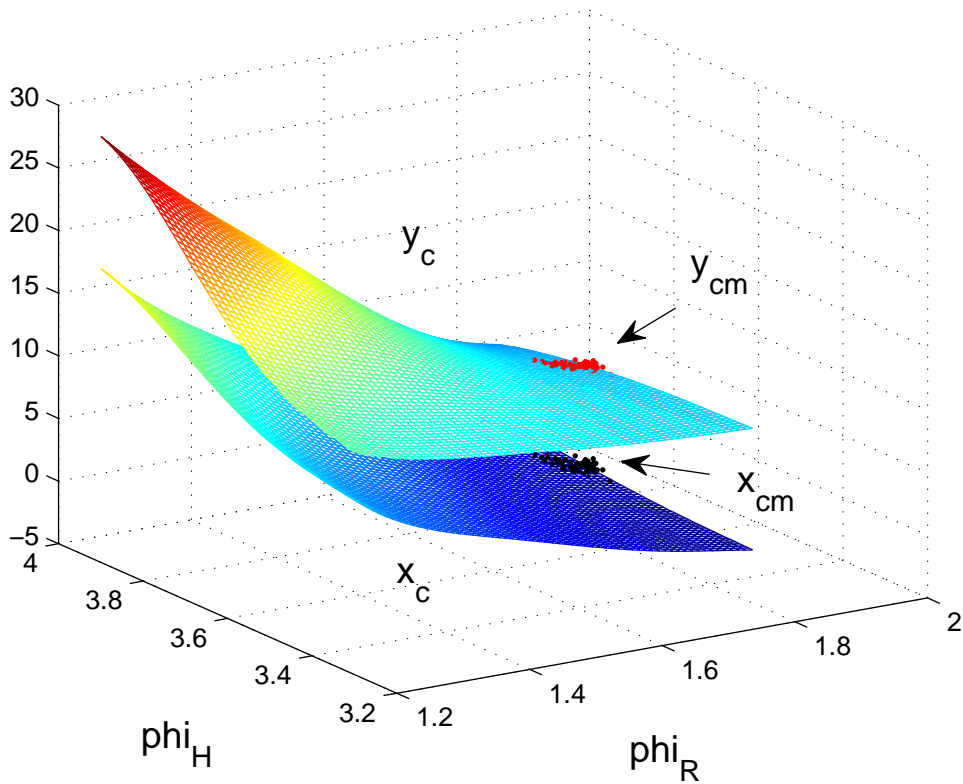

Supplement: Supplementary file 23 [file supplementary]

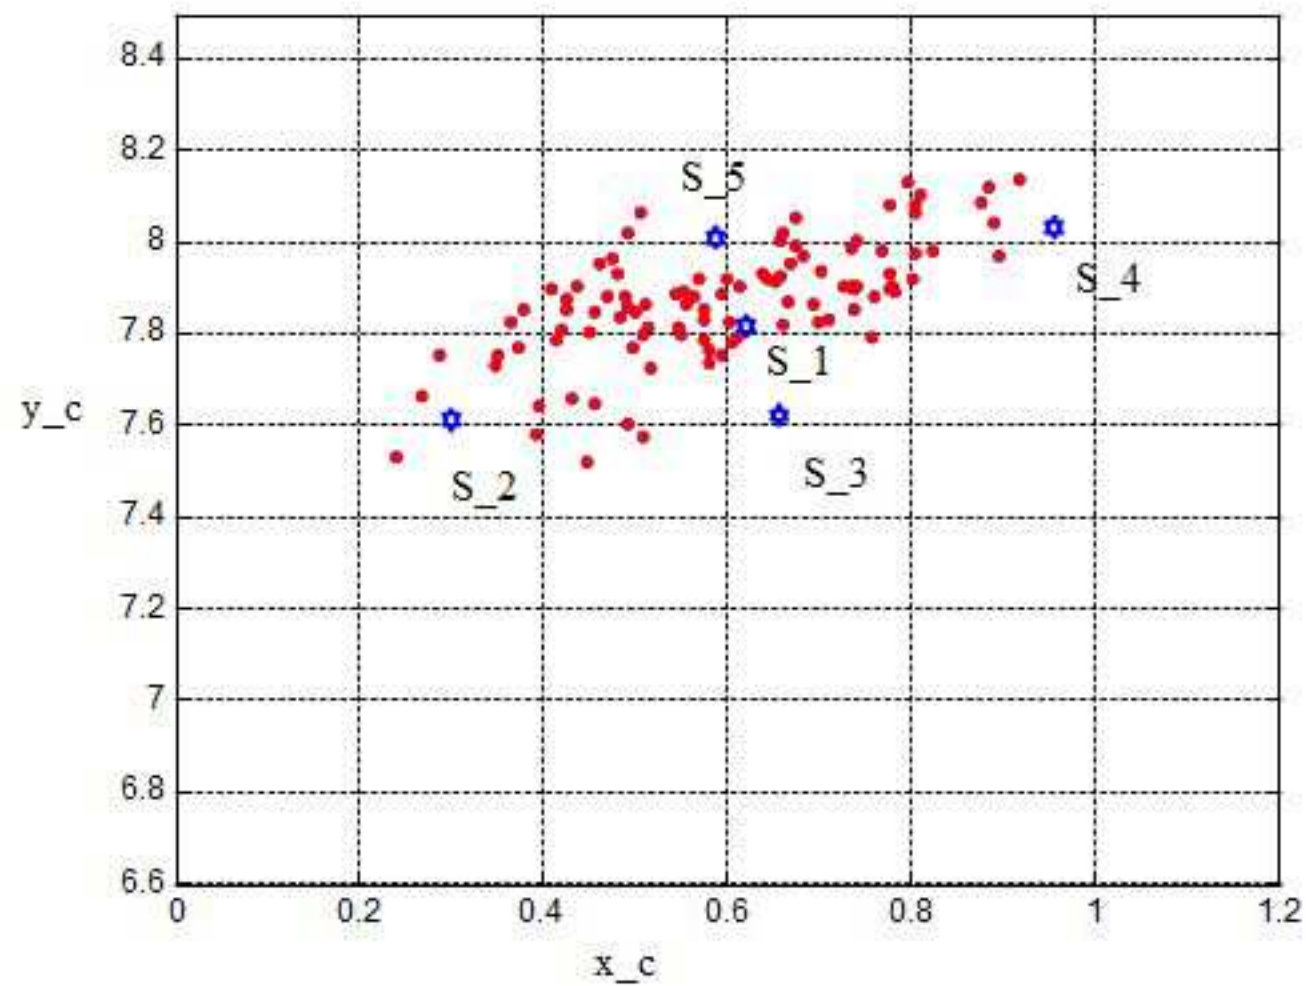

Supplement: Supplementary file 24 [file supplementary]

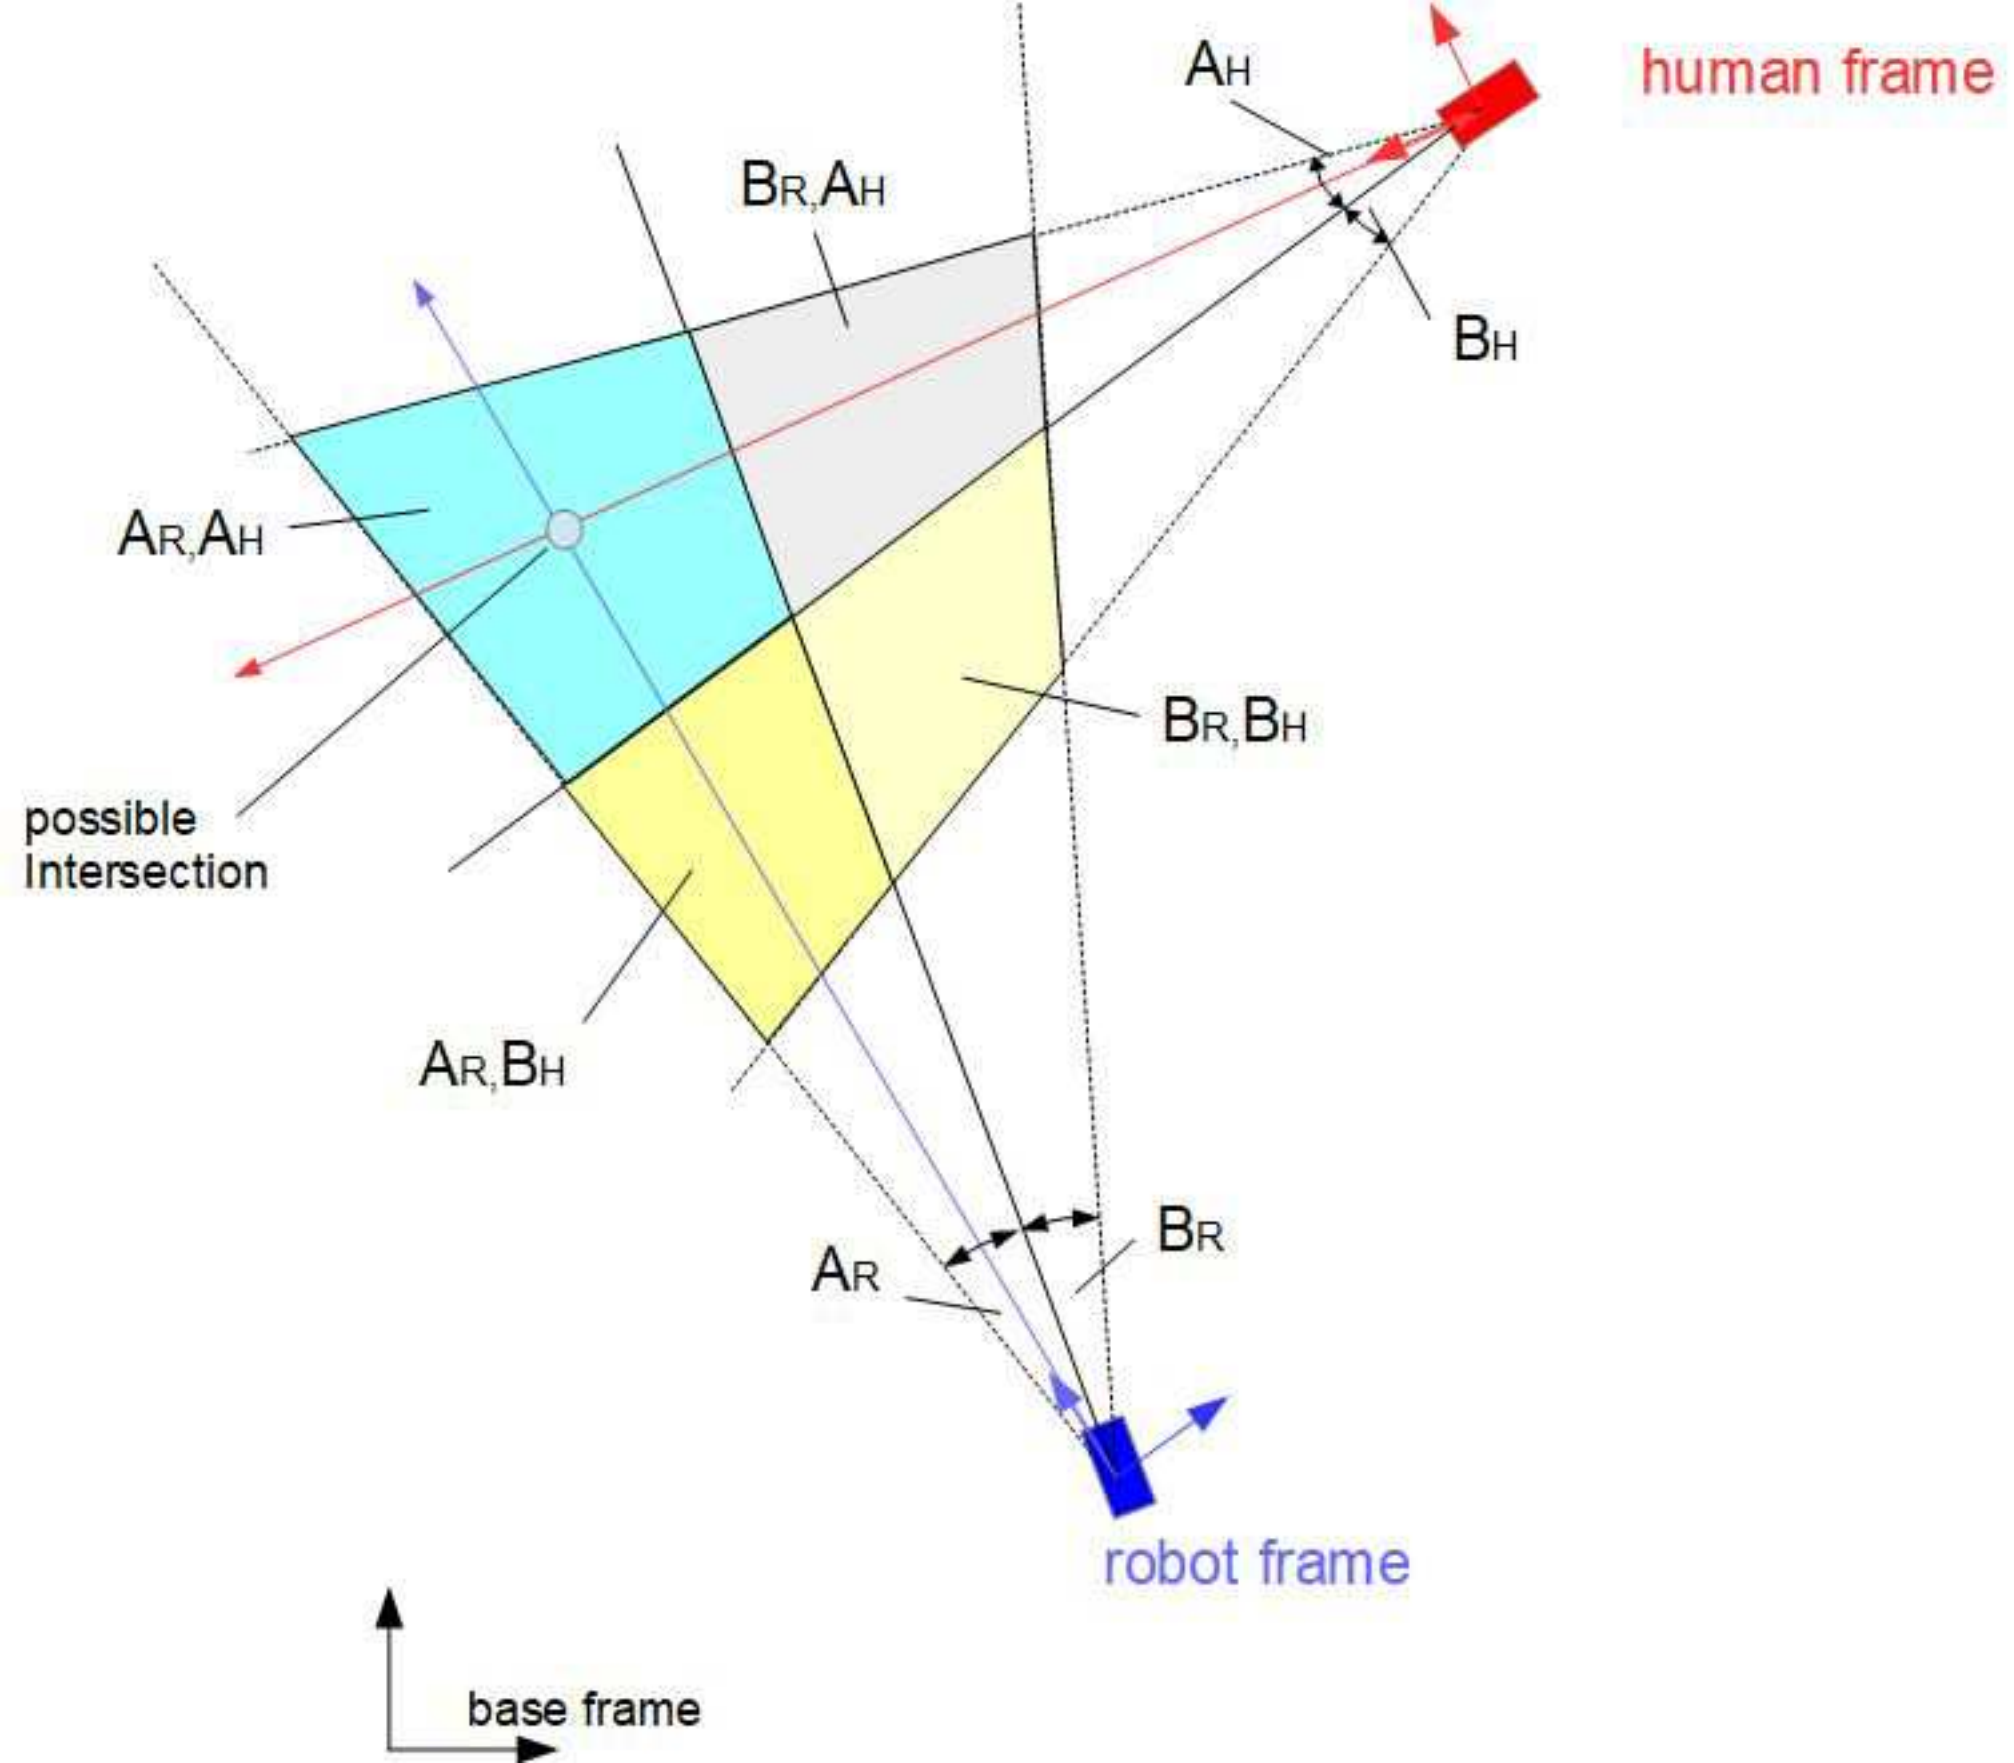

Supplement: Supplementary file 25 [file supplementary]

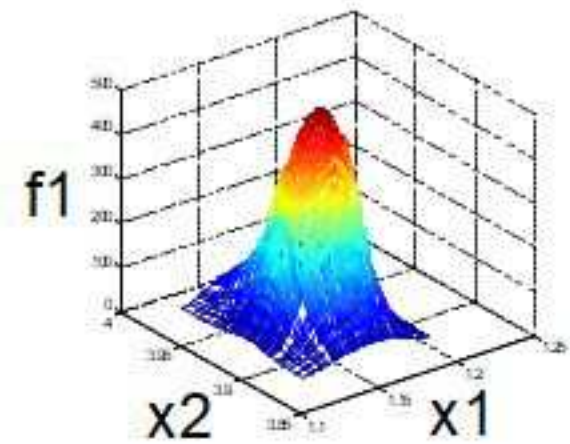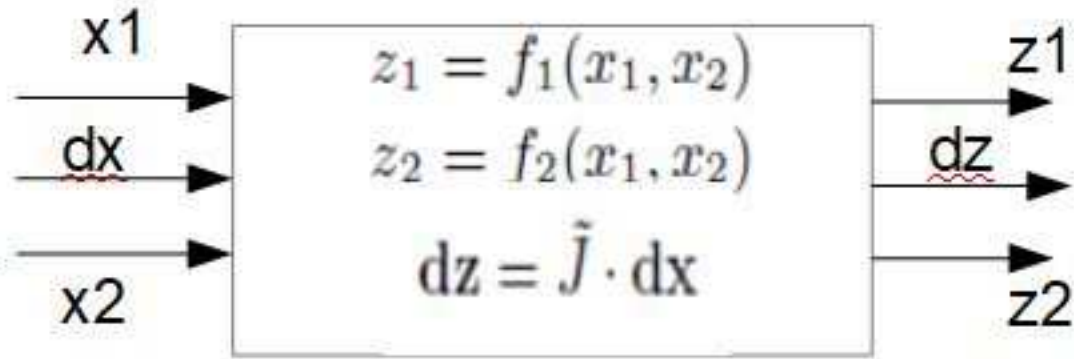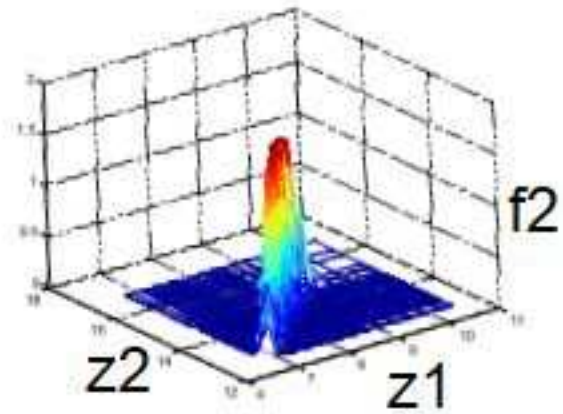

Supplement: Supplementary file 26 [file supplementary]

resolution  $\rightarrow 60^\circ$

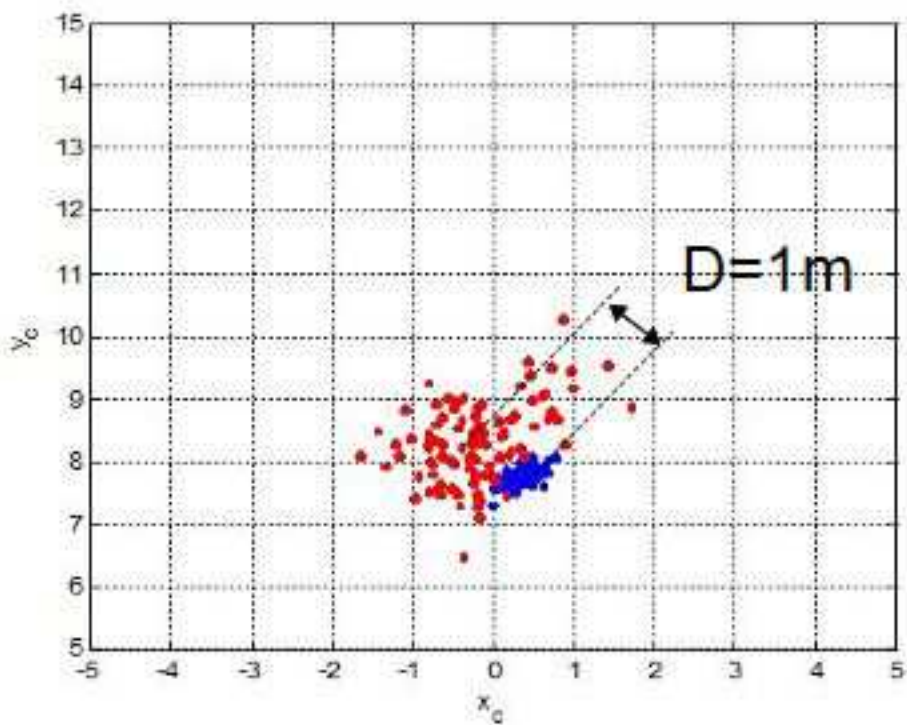

Supplement: Supplementary file 27 [file supplementary]

phi\_H

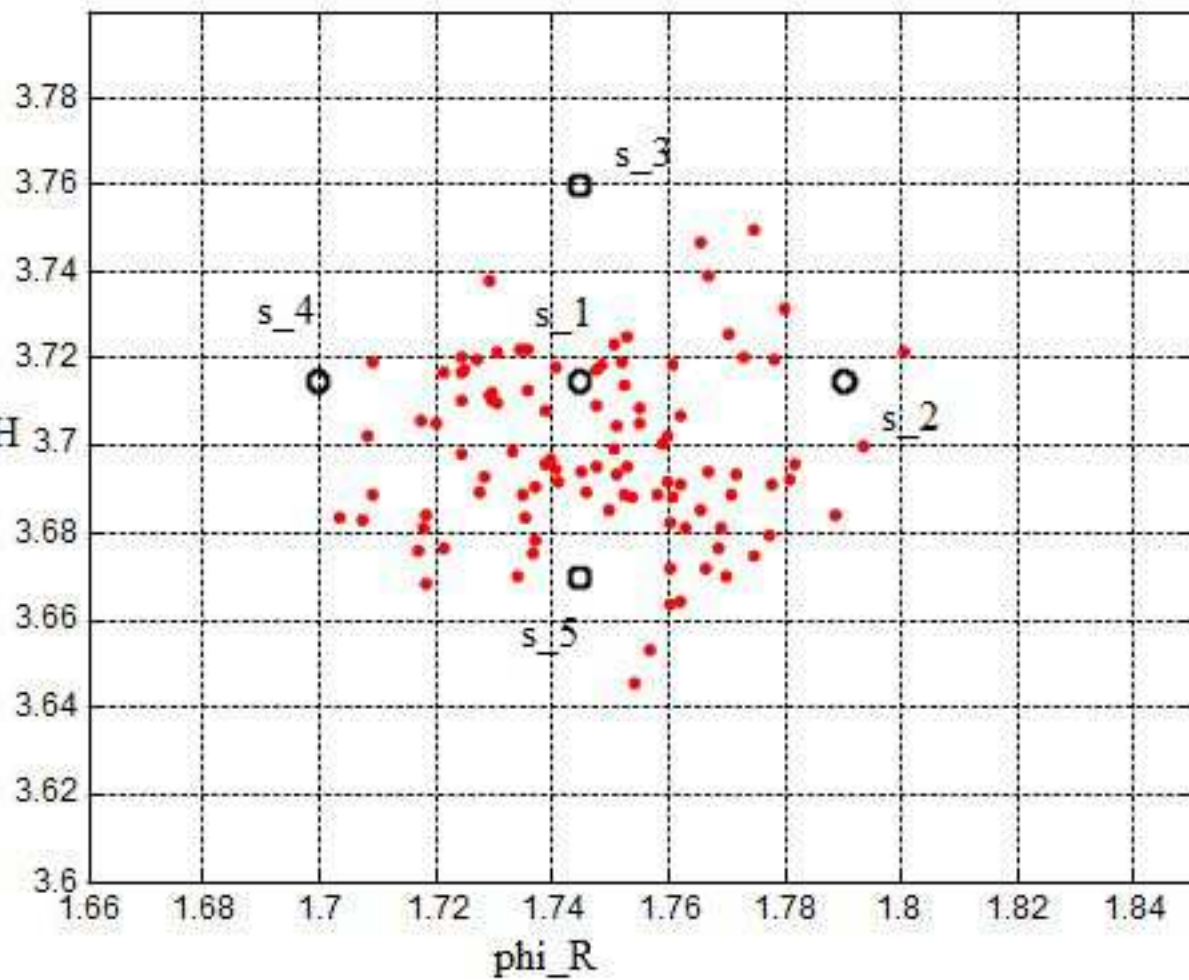

phi\_R

Supplement: Supplementary file 28 [file supplementary]

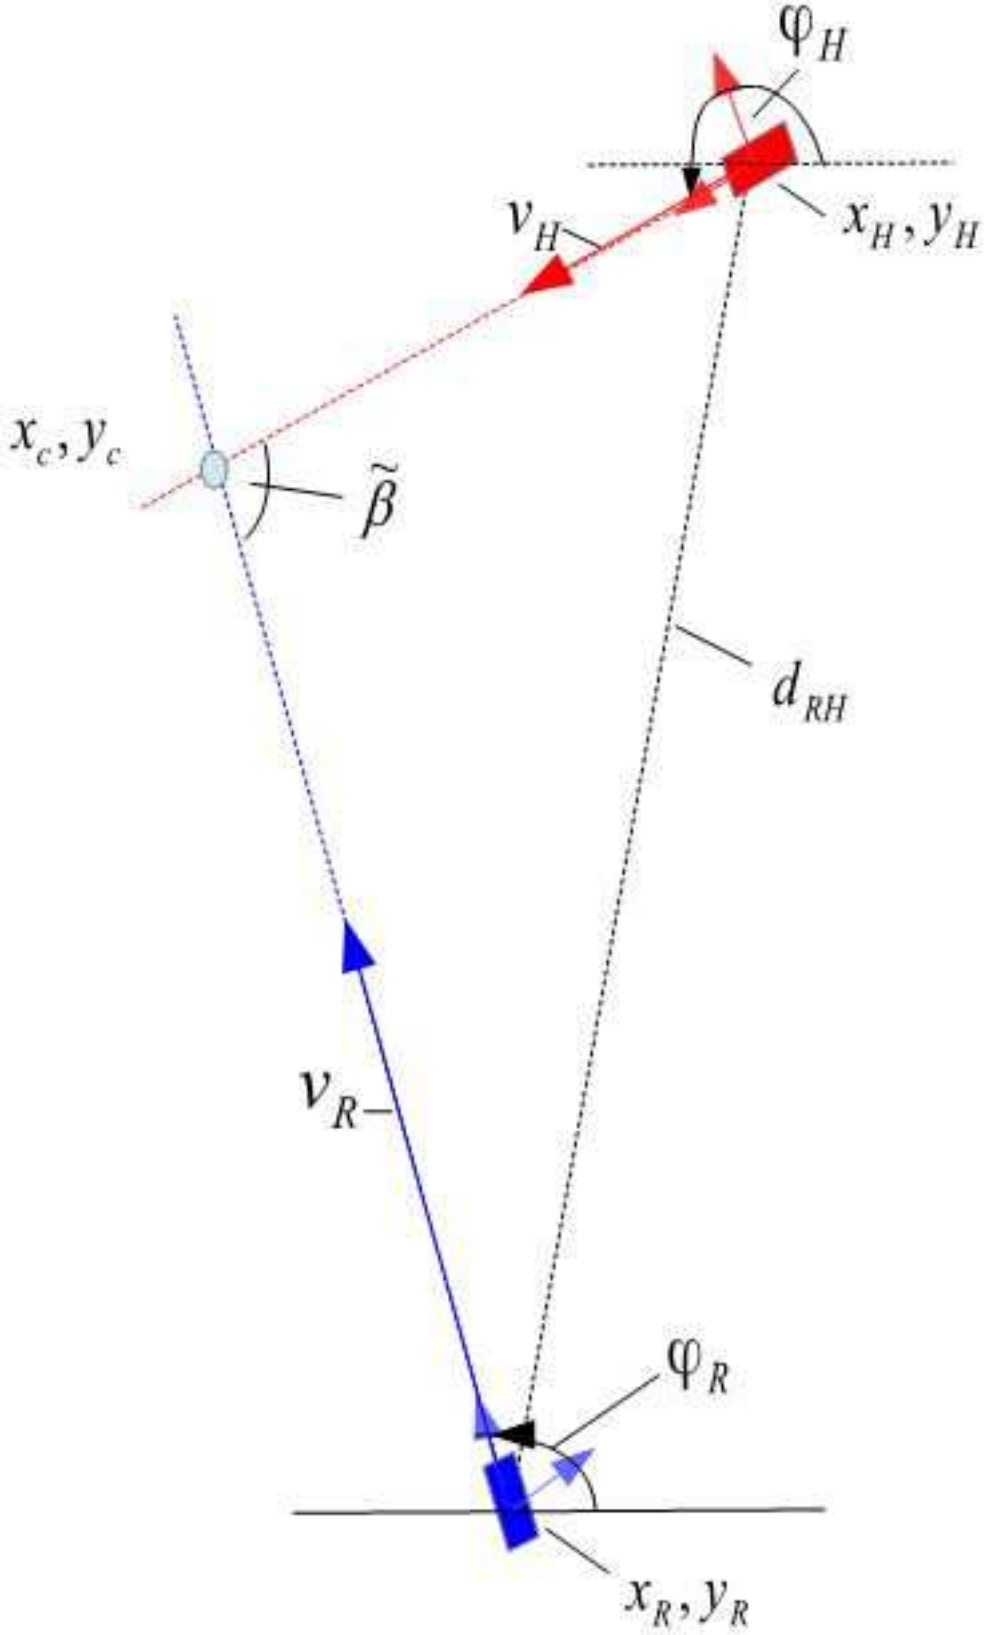

Supplement: Supplementary file 29 [file supplementary]

mean

Sigma points

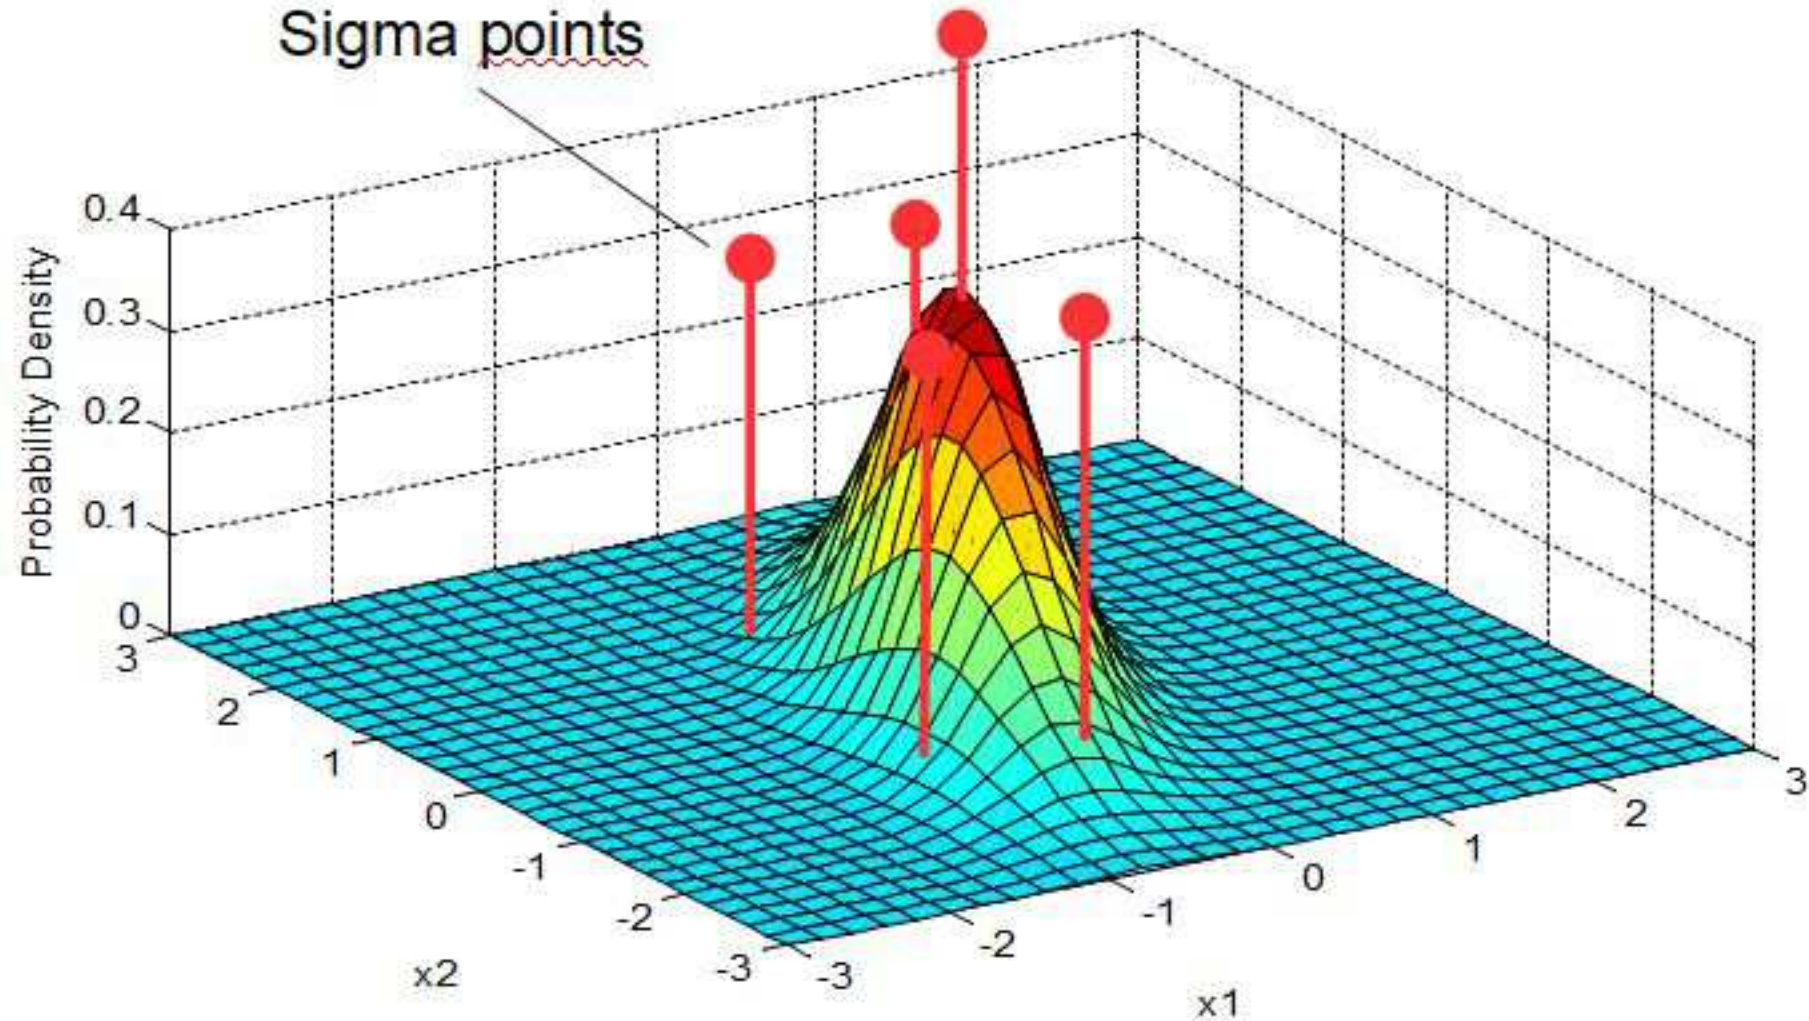

Supplement: Supplementary file 30 [file supplementary]

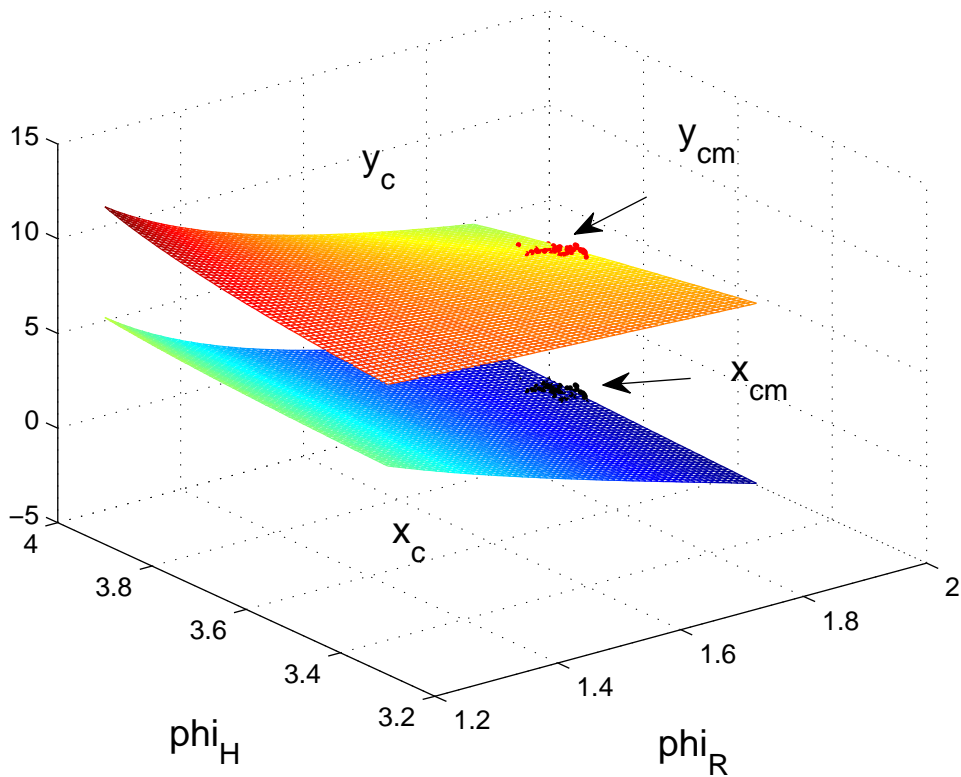

Supplement: Supplementary file 31 [file supplementary]

resolution  $\rightarrow 15^\circ$

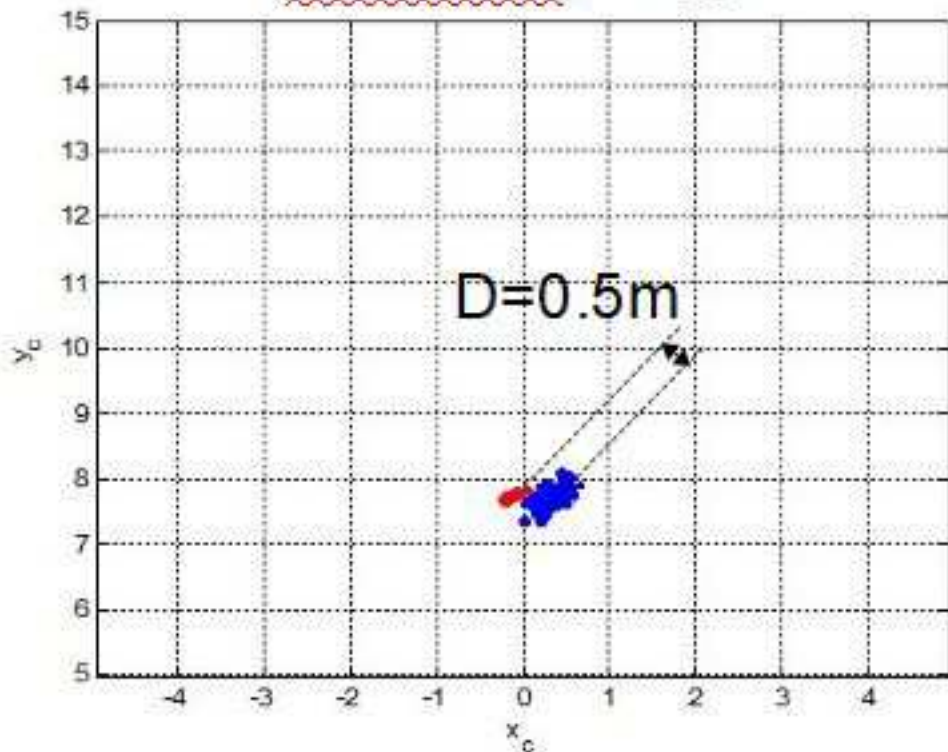

Supplement: Supplementary file 32 [file supplementary]

human frame

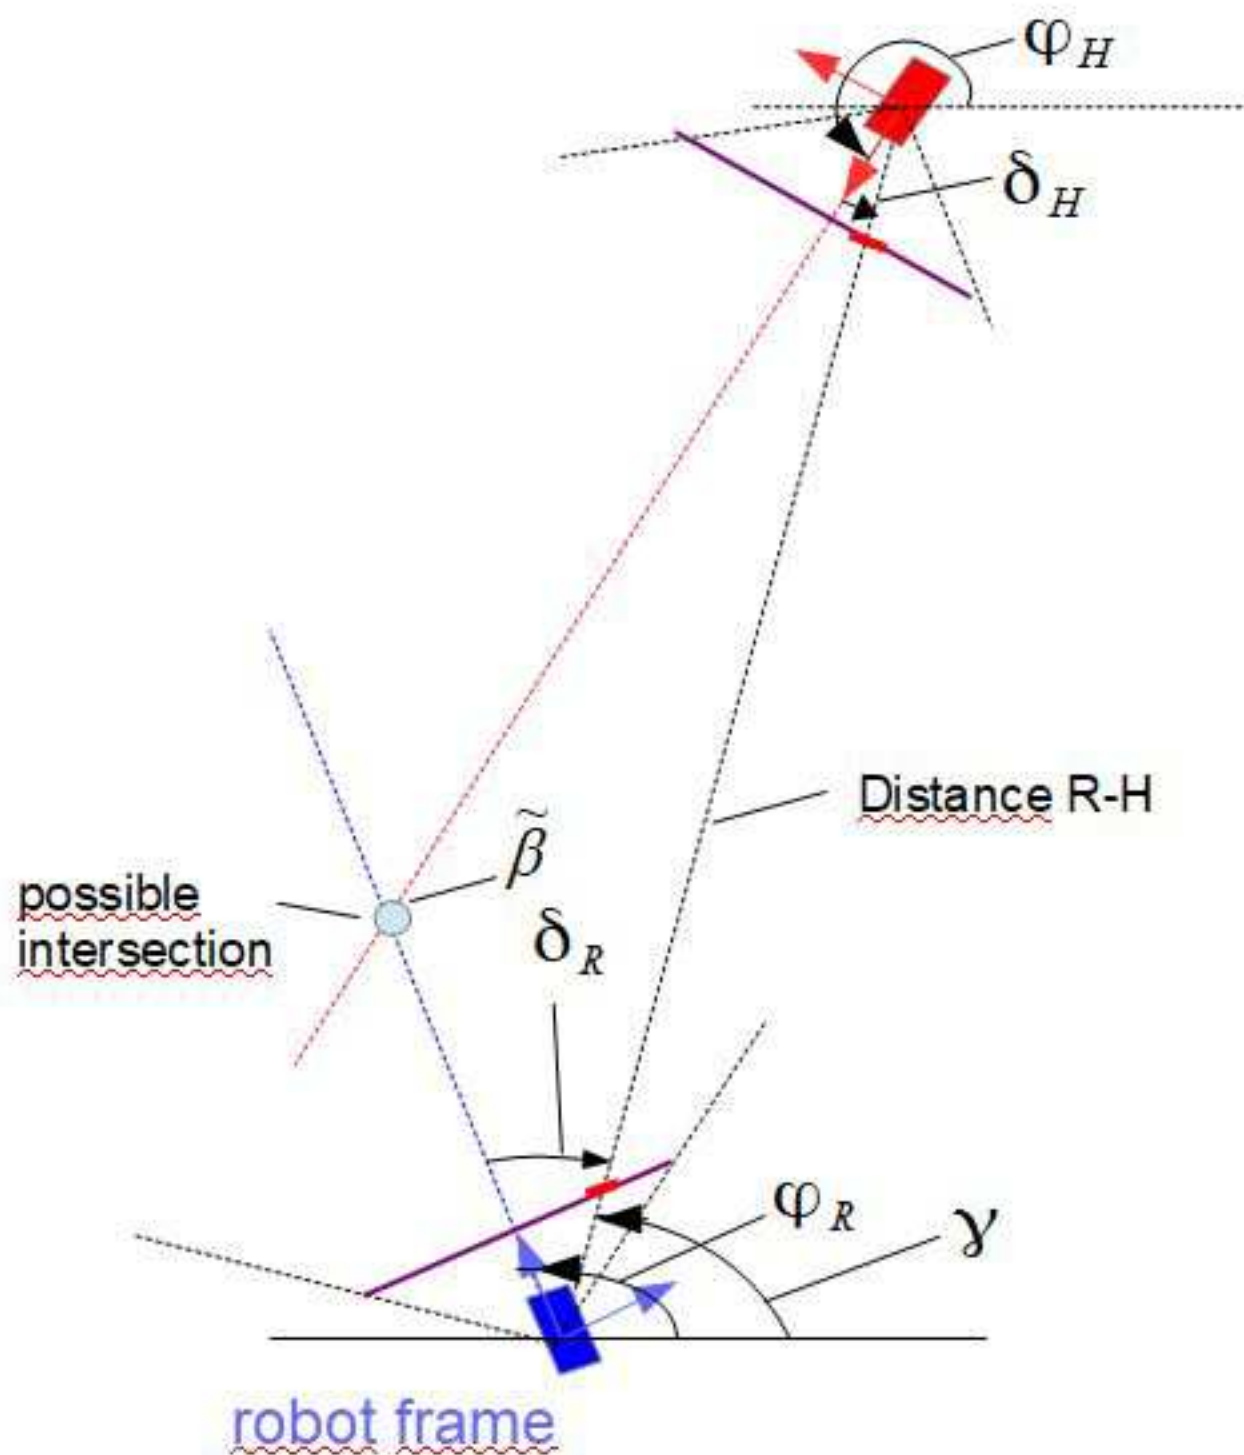

base frame

Supplement: Supplementary file 33 [file supplementary]

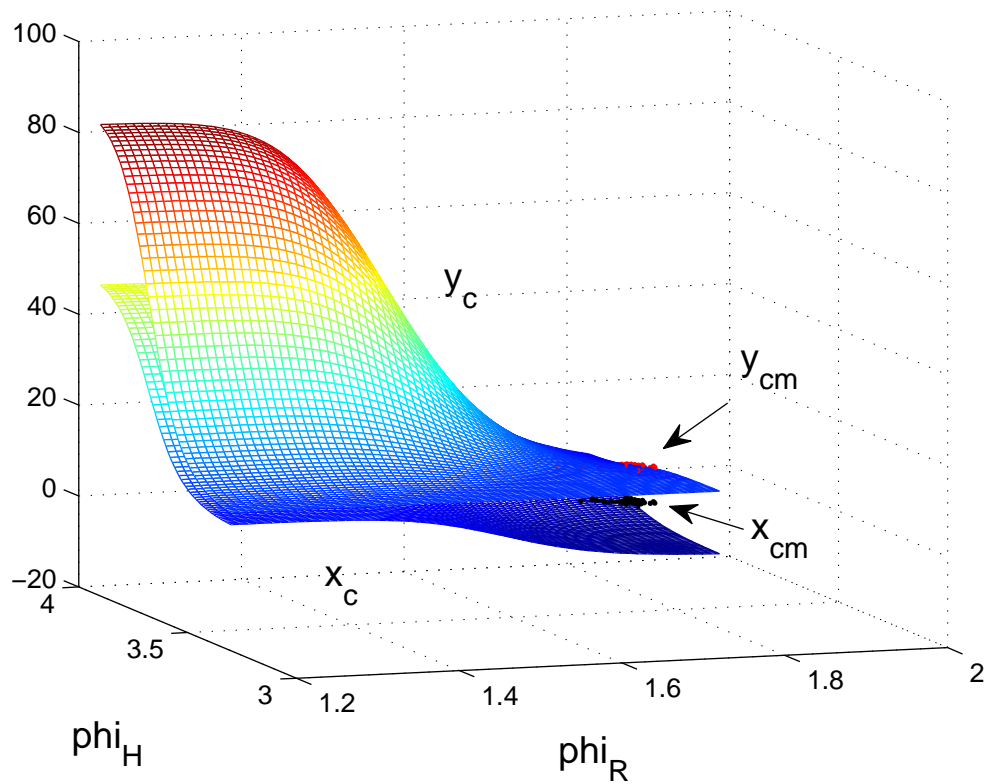

Supplement: Supplementary file 34 [file supplementary]

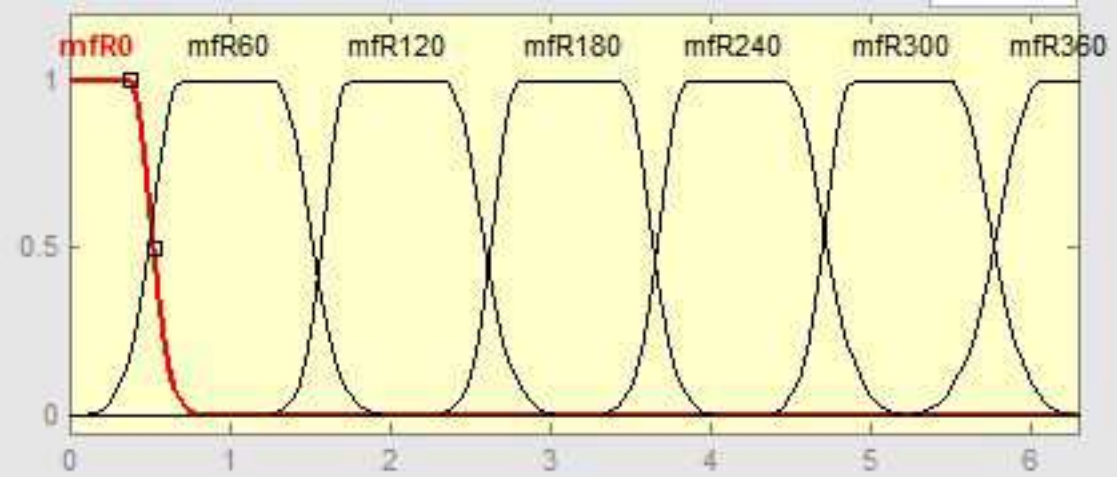

Supplement: Supplementary file 35 [file supplementary]
